1 Stout camphor tree genome fills gaps in understanding of flowering plant  
2 genome and gene family evolution.

3

4 Shu-Miaw Chaw<sup>¶\*</sup>, Yu-Ching Liu<sup>1</sup>, Han-Yu Wang<sup>1</sup>, Yu-Wei Wu<sup>2</sup>, Chan-Yi Ivy Lin<sup>1</sup>,  
5 Chung-Shien Wu<sup>1</sup>, Huei-Mien Ke<sup>1</sup>, Lo-Yu Chang<sup>1,3</sup>, Chih-Yao Hsu<sup>1</sup>, Hui-Ting Yang<sup>1</sup>,  
6 Edi Sudianto<sup>1</sup>, Ming-Hung Hsu<sup>1,4</sup>, Kun-Pin Wu<sup>4</sup>, Ning-Ni Wang<sup>1</sup>, Jim Leebens-Mack<sup>5</sup>  
7 and Isheng. J. Tsai<sup>¶\*</sup>

8

9

10 <sup>1</sup>Biodiversity Research Center, Academia Sinica, Taipei 11529, Taiwan

11 <sup>2</sup>Graduate Institute of Biomedical Informatics, College of Medical Science and Technology,  
12 Taipei Medical University, Taipei 11031, Taiwan

13 <sup>3</sup>School of Medicine, National Taiwan University, Taipei 10051, Taiwan

14 <sup>4</sup>Institute of Biomedical Informatics, National Yang-Ming University, Taipei 11221, Taiwan

15 <sup>5</sup>Plant Biology Department, University of Georgia, Athens, GA30602, USA

16

17 <sup>¶</sup> These authors contributed equally to this work

18 Correspondence: Shu-Miaw Chaw ([smchaw@sinica.edu.tw](mailto:smchaw@sinica.edu.tw)) and Isheng Jason Tsai

19 ([ijtsai@sinica.edu.tw](mailto:ijtsai@sinica.edu.tw))

20

21

22 **Abstract**

23 We present reference-quality genome assembly and annotation for the stout camphor  
24 tree (SCT; *Cinnamomum kanehirae* [Laurales, Lauraceae]), the first sequenced member  
25 of the Magnoliidae comprising four orders (Laurales, Magnoliales, Canellales, and  
26 Piperales) and over 9,000 species. Phylogenomic analysis of 13 representative seed  
27 plant genomes indicates that magnoliid and eudicot lineages share more recent common  
28 ancestry relative to monocots. Two whole genome duplication events were inferred  
29 within the magnoliid lineage, one before divergence of Laurales and Magnoliales and  
30 the other within the Lauraceae. Small scale segmental duplications and tandem  
31 duplications also contributed to innovation in the evolutionary history of *Cinnamomum*.  
32 For example, expansion of terpenoid synthase subfamilies within the Laurales spawned  
33 the diversity of *Cinnamomum* monoterpenes and sesquiterpenes.

34

35

36

37

38

39

40

## 41 **Introduction**

42 Aromatic medicinal plants have long been utilized as spices or curative agents  
43 throughout human history. In particular, many commercial essential oils are derived  
44 from flowering plants in the tree genus *Cinnamomum* L. (Lauraceae)<sup>1-3</sup>. For example,  
45 camphor, a bicyclic monoterpene ketone (C<sub>10</sub>H<sub>16</sub>O) that can be obtained from many  
46 members of this genus, has important industrial and pharmaceutical applications<sup>4</sup>.  
47 *Cinnamomum* includes approximately 250 species of evergreen aromatic trees  
48 belonging to Lauraceae (laurel family), which is an economically and ecologically  
49 important family that includes 2,850 species distributed mainly in tropical and  
50 subtropical regions of Asia and South America<sup>5</sup>. Among them, avocado (*Persea*  
51 *americana*), bay laurel (*Laurus nobilis*), camphor tree or camphor laurel (*C.*  
52 *camphora*), cassia (*C. cassia*), and cinnamon (including several *C. spp.*) are important  
53 spice and fruit species. Lauraceae has traditionally been classified as one of the seven  
54 families of Laurales, which together with Canellales, Piperales and Magnoliales  
55 constitute the Magnoliidae (“magnoliids” informally).

56

57 The magnoliids, containing about 9,000 species, are characterized by  
58 3-merous flowers with diverse volatile secondary compounds, 1-pored pollen, and  
59 insect-pollination<sup>6</sup>. Many magnoliids – such as custard apple (*Annonaceae*), nutmeg  
60 (*Myristica*), black pepper (*Piper nigrum*), magnolia, and tulip tree (*Liriodendron*  
61 *tulipifera*) – produce economically important fruits, spices, essential oils, drugs,  
62 perfumes, timber, and horticultural ornamentals. The phylogenetic position of  
63 magnoliids, however, has been uncertain. Further, there are also unresolved questions  
64 about genome evolution within the Magnoliidae. Analysis of transcriptome sequences  
65 has implicated two rounds of genome duplication in the ancestry of *Persea*  
66 (Lauraceae) and one in the ancestry of *Liriodendron* (Magnoliaceae)<sup>7</sup>, but the relative  
67 timing of these events remains ambiguous.

68

69 *Cinnamomum kanehirae*, commonly known as the stout camphor tree (SCT), a name  
70 referring to its bulky, tall and strong trunk, is endemic to Taiwan and under threat of  
71 extinction. It has a restricted distribution in broadleaved forests in an elevational band  
72 between 450 and 1,200 meters<sup>8</sup>. *Cinnamomum*, including SCT and six congeneric  
73 species contributed to Taiwan’s position as the largest producer and exporter of  
74 camphor in the 19<sup>th</sup> century, and its value was further enhanced due to its valuable

75 wood, with trunks exhibiting the largest diameters among flowering plants of Taiwan,  
76 and aromatic, decay-resistance attributed to the essential oil D-terpinenol<sup>9</sup>. *Antrodia*  
77 *cinnamomea*, a parasitic fungus that infects the trunks of SCT causing heart rot<sup>10</sup>. The  
78 fungus produces several medicinal triterpenoids that impede the growth of liver  
79 cancer cells<sup>10,11</sup> and act as antioxidants that protect against atherosclerosis<sup>12</sup>. Due to  
80 intensive deforestation in the past half century, followed by poor seed germination  
81 and illegal logging to cultivate the fungus, natural populations of SCT are fragmented  
82 and threatened<sup>13,14</sup>.

83

84 Here we report a chromosome-level genome assembly of SCT. Comparative analyses  
85 of the SCT genome with those of 10 other angiosperms and two gymnosperms  
86 (ginkgo and Norway spruce) allow us to resolve the phylogenetic position of the  
87 magnoliids and shed new light on flowering plant genome evolution. Several gene  
88 families appear to be uniquely expanded in the SCT lineage, including the terpenoid  
89 synthase superfamily. Terpenoids play vital primary roles as photosynthetic pigments  
90 (carotenoids), electron carriers (plastoquinone and ubiquinone side chains), and  
91 regulators of plant growth (the phytohormone gibberellin and phytol side chain in  
92 chlorophyll)<sup>15</sup>. Specialized volatile or semi-volatile terpenoids are also important  
93 biological and ecological signals that protect plants against abiotic stress and promote  
94 beneficial biotic interactions above and below ground with pollinators, pathogens,  
95 herbivorous insect, and soil microbes<sup>15-18</sup>. Analyses of the SCT genome inform  
96 understanding of gene family evolution contributing to terpenoid biosynthesis, shed  
97 light on early events in flowering plant diversification, and provide new insights into  
98 the demographic history of SCT with important implications for future conservation  
99 efforts.

100

101

## 102 **Results**

103

### 104 **Assembly and annotation of SCT**

105 SCT is diploid (2n=24; Supplementary Fig. 1a) with an estimated genome size of 800  
106 to 846 Mb (Supplementary Figs. 1b, 2). An initial assembly with 141x and 50x  
107 Illumina paired-end and mate-pair reads, respectively (Supplementary Table 1),  
108 produced 48,650 scaffolds spanning 714.7 Mb (scaffold N50 = 594 kb and N90 = 3  
109 kb; Table 1). A second, long-read assembly derived solely from 85x Pacbio long  
110 reads (read N50 = 11.1 kb; contig N50 = 0.9 Mb) was scaffolded with 207x “Chicago”  
111 reconstituted-chromatin and 204x Hi-C paired-end reads using the HiRise pipeline<sup>19</sup>  
112 (Table 1; Supplementary Fig. 3). A final, integrated assembly of 730.7 Mb was

113 produced in 2,153 scaffolds, comprising 91.3% of the flow cytometry genome size  
114 estimate. The final scaffold N50 was 50.4 Mb with more than 90% in 12  
115 pseudomolecules, presumably corresponding to the 12 SCT chromosomes.  
116 Using a combination of reference plant protein homology support and transcriptome  
117 sequencing derived from a variety of tissues (Supplementary Fig. 1c and Table 2) and  
118 *ab initio* gene prediction, 27,899 protein-coding genes models were annotated using  
119 the MAKER2 pipeline<sup>20</sup> (Table 1). Of these, 93.7% were found to be homologous to  
120 proteins in the TrEMBL database and 50% could be assigned gene ontology terms  
121 using eggNOG-mapper<sup>21</sup>. The proteome was estimated to be at least 89% complete  
122 based on BUSCO<sup>22</sup> (Benchmarking Universal Single-Copy Orthologs) assessment  
123 which is comparable to other sequenced plant species (Supplementary Table 3).  
124 Orthofinder<sup>23</sup> clustering of SCT gene models with those from twelve diverse seed  
125 plant genomes yielded 20,658 orthologous groups (OGs) (Supplementary Table 4).  
126 24,148 SCT genes (85.8%) were part of OGs with orthologues from at least one other  
127 plant species. 3,744 gene models were not orthologous to others, and only 210 genes  
128 were part of the 48 SCT specific OGs. Altogether, they suggest that the phenotypic  
129 diversification in magnoliids may be fueled by *de novo* birth of species-specific genes  
130 as well as expansion of existing gene families.

131

### 132 **Genome characterization**

133 We identified 3,950,027 bi-allelic heterozygous sites in the SCT genome,  
134 corresponding to an average heterozygosity of 0.54% (one heterozygous SNP per 185  
135 bp). The minor allele frequency of these sites had a major peak around 50% consistent  
136 with the fact that SCT is diploid with no evidence for recent aneuploidy  
137 (Supplementary Fig. 4). The spatial distribution of heterozygous sites was highly  
138 variable with 23.9% of the genome exhibiting less than 1 SNP loci per kb compared to  
139 10% of the genome with at least 12.6 SNP loci per kb. Runs of homozygosity (ROH)  
140 regions appeared to be distributed randomly across SCT chromosomes reaching a  
141 maximum of 20.2 Mb in scaffold 11 (Fig. 1a). Such long ROH regions may be  
142 associated with selective sweeps, inbreeding or recent population bottlenecks.  
143 Pairwise sequentially Markovian coalescent<sup>24</sup> (PSMC) analysis based on  
144 heterozygous SNP densities implicated a continuous reduction of effective population  
145 size over the last 9 Ma (Fig. 1b) with a possible bottleneck coincident with the  
146 mid-Pleistocene climatic shift at 0.9 Ma. Such patterns may reflect a complex  
147 population history of SCT associated with the geologic history of Taiwan including  
148 uplift and formation of the island in the late Miocene (9 Ma) followed by mountain  
149 building 5–6 Ma, respectively<sup>25</sup>.

150

151 Transposable elements (TEs) and interspersed repeats made up 48% of the genome  
152 assembly (Supplementary Table 5). The majority of the TEs belonged to LTR  
153 retrotransposons (25.53%), followed by DNA transposable elements (12.67%).  
154 Among the LTR, 40.75% and 23.88% of retrotransposons belonged to Ty3/Gypsy and  
155 Ty1/Copia, respectively (Supplementary Table 5). Phylogeny of reverse transcriptase  
156 domain showed that the majority of Ty3/Gypsy copies formed a distinct clade (20,092  
157 copies) presumably as a result of recent expansion and proliferation, while Ty1/Copia  
158 elements were grouped into two sister clades (7,229 and 2,950 copies; Supplementary  
159 Fig. 5). With the exception of two scaffolds, both Ty3/Gypsy and Ty1/Copia LTR  
160 TEs were clustered within the pericentromeric centers of the 12 largest scaffolds (Fig  
161 2; Supplementary Fig. 6). Additionally, the LTR enriched regions (defined by 100 kb  
162 with excess of 50% comprising LTR class TEs) had on average 35% greater coverage  
163 than rest of the genome (Fig 2; Supplementary Fig. 7), suggesting that these repeats  
164 were collapsed in the assembly and may have contributed to the differences in flow  
165 cytometry and k-mer genome size estimates. The coding sequence content of SCT is  
166 similar to the other angiosperm genomes included in our analyses (Supplementary  
167 Table 3), while introns are slightly longer in SCT due to a higher density of TEs ( $P <$   
168 0.001, Wilcoxon rank sum test; Supplementary Fig. 8).

169  
170 As has been described for other plant genomes<sup>26</sup>, the chromosome-level scaffolds of  
171 SCT exhibit low protein-coding gene density and high TE density in the centers of  
172 chromosomes, and increased gene density towards the chromosome ends (Fig. 2). We  
173 identified clusters of putative subtelomere heptamer TTTAGGG extending as long as  
174 2,547 copies, which implicate telomeric repeats in plants<sup>27</sup> (Supplementary Table 6).  
175 Additionally, 687 kb of nuclear plastid DNAs (NUPT) averaging around 202.8 bp  
176 were uncovered (Supplementary Table 7). SCT NUPTs were overwhelmingly  
177 dominated by short fragments with 96% of the identified NUPTs less than 500 bp  
178 (Supplementary Table 8). The longest NUPT is ~20 kb in length and syntenic with  
179 99.7% identity to a portion of the SCT plastome that contains seven protein-coding  
180 and five tRNA genes (Supplementary Fig. 9).

181

### 182 **Phylogenomic placement of *C. kanehirae* sister to eudicots**

183 The magnoliids have been hypothesized as the sister lineage to (1) the Chloranthaceae,  
184 (2) a clade including eudicots, Chloranthaceae, Ceratophyllaceae, (3) the monocots, (4)  
185 a monocot + eudicot clade, or (5) a Chloranthaceae + Ceratophyllaceae clade, based  
186 on phylogenetic analyses of plastid genes, plastomic IR regions, four mitochondrial  
187 genes, inflorescence and floral structures, and low copy nuclear genes<sup>7,28</sup>. Similar to  
188 the APG III, the APG IV system<sup>29</sup> placed Magnoliidae and Chloranthaceae together

189 as sister to a robust clade comprising monocots and Ceratophyllales + eudicots. To  
190 resolve the long-standing debate over the phylogenetic placement of magnoliids  
191 relative to other major flowering plant lineages, we constructed a phylogenetic tree  
192 based on 211 strictly single copy orthologue sets shared among the 13 genomes  
193 included in our analyses. A single species tree was recovered through maximum  
194 likelihood analysis<sup>30</sup> of a concatenated supermatrix of the single copy gene  
195 alignments and coalescent-based analysis using the 211 gene trees<sup>31</sup> (Fig. 3;  
196 Supplementary Fig. 10). SCT, representing the magnoliid lineage was placed as sister  
197 to the eudicot clade (Fig. 3). Using MCMCtree<sup>32</sup>, we calculated a 95% confidence  
198 interval for the time of divergence between magnoliids and eudicots to be 139.41–  
199 191.57 million years (Ma; Supplementary Fig. 11), which overlaps with two other  
200 recent estimates (114.75–164.09 Ma<sup>33</sup> and 118.9–149.9 Ma<sup>34</sup>).

201

### 202 **Synteny analysis / whole genome duplication (WGD)**

203 Previous investigations of EST data inferred a genome-wide duplication within the  
204 magnoliids before the divergence of the Magnoliales and Laurales<sup>7</sup>, but synteny-based  
205 testing of this hypothesis has not been possible without an assembled magnoliid  
206 genome. A total of 16,498 gene pairs were identified in 992 syntenic blocks  
207 comprising 72.7% of the SCT genome assembly. Of these intragenomic syntenic  
208 blocks, 72.3% were found to be syntenic to more than one location on the genome,  
209 suggesting that more than one WGD occurred in the ancestry of SCT (Fig. 4a). Two  
210 rounds of ancient WGD were implicated by extensive synteny between pairs of  
211 chromosomal regions and significantly but less syntenic pairing of each region with  
212 two additional genomic segments (Supplementary Fig. 12). Synteny blocks of SCT's  
213 12 largest scaffolds were assigned to five clusters that may correspond to pre-WGD  
214 ancestral chromosomes (Fig. 4a; Supplementary Fig. 12 and Note).

215

216 *Amborella trichopoda* is the sole species representing the sister lineage to all other  
217 extant angiosperms, and it has no evidence of WGD since divergence from the last  
218 common ancestor extant flowering plant lineages<sup>35</sup>. To confirm two rounds of WGD  
219 took place in ancestry of SCT after divergence of lineages leading to SCT and *A.*  
220 *trichopoda*, we assessed synteny between the two genomes. Consistent with our  
221 hypothesis, four segments of the SCT genome aligned with a single region in the *A.*  
222 *trichopoda* genome (Fig. 4b; Supplementary Fig. 13).

223

224 In order to more precisely infer the timing of the two rounds of WGD evident in the  
225 SCT genome, intragenomic and interspecies homolog Ks (synonymous substitutions  
226 per synonymous site) distributions were estimated. SCT intragenomic duplicates

227 showed two peaks around 0.46 and 0.76 (Fig. 5a), congruent with the two WGD  
228 events. Based on these two peaks, we were able to infer the karyotype evolution by  
229 organizing the clustered synteny blocks further into four groups presumably  
230 originating from one of the five pre-WGD chromosomes (Supplementary Fig. 14).  
231 Comparison between *Aquilegia coerulea* (Ranunculales, a sister lineage to all other  
232 extant eudicots<sup>35</sup>) and SCT orthologs revealed a prominent peak around  $Ks = 1.41$   
233 (Fig. 5a), while the *Aquilegia* intra-genomic duplicate was around  $Ks = 1$ , implicating  
234 independent WGDs following the divergence of lineages leading to SCT and  
235 *Aquilegia*. The availability of the transcriptome of 17 Laurales + Magnoliales from  
236 1,000 plants initiative<sup>36</sup> allowed us to test the hypothesized timing of the WGDs  
237 evident in the SCT genome<sup>8</sup>.  $Ks$  distribution of all species from Lauraceae have  
238 shown apparent two peaks, but only one peak was observed in other Laurales and  
239 Magnoliales samples, suggesting a WGD predating divergence of these two orders  
240 followed by a second recent WGD in the early ancestry of the Lauraceae (Fig. 5b).  
241 The  $Ks$  peak seen in *Aquilegia* data is likely attributable to WGD within the  
242 Ranunculales well after the divergence of eudicots and magnoliids (Supplementary  
243 Fig. 15).

244

#### 245 **Specialization of the magnoliids proteome**

246 We sought to identify genes and protein domains specific to SCT by annotating  
247 protein family (Pfam) domains<sup>37</sup> and assessing their distribution across the 13 seed  
248 plant genomes included in our phylogenomic analyses. Consistent with the  
249 observation that there were very few SCT-specific OGs, principal component analysis  
250 of Pfam domain content clustered SCT with the monocots and eudicots, with the first  
251 two principal components separating gymnosperms and *A. trichopoda* from this group  
252 (Supplementary Fig. 16a). There were considerable overlaps between SCT, eudicot  
253 and monocot species, suggesting significant functional diversification since these  
254 three lineages split. SCT also showed a significant enrichment and reduction of 111  
255 and 34 protein domains compared to other plant species, respectively (Supplementary  
256 Fig. 16b and Table 9). Gain of protein domains included the terpene synthase C  
257 terminal domain involved in defense responses and the leucine-rich repeats (628 vs  
258 334.4) in plant transpiration efficiency<sup>38</sup>. Interestingly, we found that SCT possesses  
259 21 copies of EIN3/EIN3-like (EIL) transcription factor, more than the previously  
260 reported maximum of 17 copies in the banana genome (*Musa acuminata*)<sup>39</sup>. EILs  
261 initiate an ethylene signaling response by activating ethylene response factors (ERF),  
262 which we also found to be highly expanded in SCT (150 copies versus an average of  
263 68.3 copies from nine species reported in ref<sup>39</sup>; Supplementary Fig. 17). Ethylene

264 signaling in plants was reported to be associated with fruit ripening<sup>39</sup> and secondary  
265 growth in wood formation<sup>40</sup> and may be involved in either processes in SCT.

266

267 CAFE<sup>41</sup> was used to assess OG expansions and contractions across (Fig. 3) the seed  
268 plant phylogeny. Gene family size evolution was dynamic across the phylogeny, and  
269 the branch leading to SCT did not exhibit significantly different numbers of  
270 expansions and contractions. Enrichment of gene ontology terms revealed either  
271 various different gene families sharing common functions or single gene families  
272 undergoing large expansions (Supplementary Table 10 and 11). For example, the  
273 expanded members of plant resistance (R) genes add up to “plant-type hypersensitive  
274 response” (Supplementary Table 10). In contrast, the enriched gene ontology terms  
275 from the contracted gene families of SCT branch (Supplementary Table 11) contains  
276 members of ABC transporters, indole-3-acetic acid-amido synthetase, xyloglucan  
277 endotransglucosylase/hydrolase and auxin-responsive protein, all of which are part of  
278 the “response to auxin”.

279

### 280 **Resistance (R) genes**

281 The SCT genome annotation included 387 resistance gene models, 82% of which  
282 belong to nucleotide-binding site leucine-rich repeat (NBS-LRR) or coiled-coil  
283 NBS-LRR (CC-NBS-LRR) types. This result is consistent with a previous report that  
284 LRR is one of the most abundant protein domains in plants and it is highly likely that  
285 SCT is able to recognize and fight off pathogen products of avirulence (Avr) genes<sup>42</sup>.  
286 Among the sampled 13 genomes, SCT harbors the highest number of R genes among  
287 non-cultivated plants (Supplementary Fig. 18). The phylogenetic tree constructed  
288 from 2,465 NBS domains also suggested that clades within the gene family have  
289 diversified independently within the eudicots, monocots and magnoliids. Interestingly,  
290 the most diverse SCT NBS gene clades were sister to depauperate eudicot NBS gene  
291 clades (Supplementary Fig. 19).

292

### 293 **Terpene synthase gene family**

294 One of the most striking features of the SCT genome is the large number of terpene  
295 synthase (TPS) genes (*CkTPSs*). A total of 101 *CkTPSs* were predicted and annotated,  
296 the largest number for any other genome to date. By including transcriptome dataset of  
297 two more species from magnoliids (*Persea americana* and *Saruma henryi*),  
298 phylogenetic analyses of TPS from 15 species were performed to place *CkTPSs* among  
299 six of seven TPS subfamilies that have been described for seed plants<sup>43-45</sup> (Fig. 6, Table  
300 2 and Supplementary Fig. 20–25). *CkTPS* genes placed in the TPS-c (2) and TPS-e (5)



301 subfamilies likely encode diterpene synthases such as copalyl diphosphate synthase  
302 (CPS) and *ent*-kaurene synthase (KS)<sup>46</sup>. These are key enzymes catalyzing the  
303 formation of the 20-carbon isoprenoids (collectively termed diterpenoids; C20), which  
304 was thought to be eudicot-specific<sup>45</sup> and serve primary functions like regulating plant  
305 primary metabolism. The remaining 94 predicted *CkTPSs* likely code for the 10-carbon  
306 monoterpene (C10) synthases, 15-carbon sesquiterpene (C15) synthases, and additional  
307 20-carbon diterpene (C20) synthases (Table 2). With 25 and 58 homologs, respectively,  
308 TPS-a and TPS-b subfamilies are most diverse in SCT, presumably contributing to the  
309 mass and mixed production of volatile C15s and C10s<sup>47</sup>. *CkTPSs* are not uniformly  
310 distributed throughout the chromosomes (Supplementary Table 12) and clustering of  
311 members from individual subfamilies were observed as tandem duplicates  
312 (Supplementary Fig. 26). For instance, scaffold 7 contains 29 *CkTPS* genes belonging  
313 to several subfamilies including all of the eight *CkTPS-a*, 12 *CkTPS-b*, five *CkTPS-e*  
314 and three *CkTPS-f* (Supplementary Fig. 26). In contrast, only two members of *CkTPS-c*  
315 reside in scaffold 1. Twenty-four *CkTPSs* locate in other smaller scaffolds, 22 of which  
316 code for subfamily TPS-b (Supplementary Fig. 21).

317

318 It is noteworthy that the TPS gene tree resolved Lauraceae-specific TPS gene clades  
319 within the TPS-a, -b, -f, and -g subfamilies (Supplementary Fig. 20–23). This pattern  
320 of TPS gene duplication in a common ancestor of *Persea* and *Cinnamomum* and  
321 subsequent retention may indicate subfunctionalization or neofunctionalization of  
322 duplicated *TPSs* within the Lauraceae. A magnoliids-specific subclade in the TPS-a  
323 subfamily was also identified in analyses including more magnoliid TPS genes with  
324 characterized functions (Supplementary Fig. 20). Indeed, we detected positive  
325 selection in the Lauraceae-specific TPS-f -I and -II subclades implying functional  
326 divergence (Supplementary Table 13). Together, these data suggest increasing  
327 diversification of magnoliid TPS genes both before and after the origin of the  
328 Lauraceae. The distribution of TPS genes in the SCT genome suggests that both  
329 segmental (including WGD) and tandem duplication events contributed to  
330 diversification of TPS enzymes in the SCT lineage and the terpenoids they produce.

331

## 332 **Discussion**

333 It is now challenging to find a wild SCT population making the conservation and  
334 basic study of this tree a priority. SCTs have been intensively logged since the 19<sup>th</sup>

335 century initially for hardwood properties and association with fungus *Antrodia*  
336 *cinnamomea*. The apparent runs of homozygosity have been observed due to  
337 anthropogenic selective pressures or inbreeding in several livestock<sup>47</sup>, though  
338 inbreeding as a result of recent population bottleneck may be a more likely  
339 explanation for SCT. Interestingly, continuous decline in effective population size  
340 was inferred since 9 Ma. These observations may reflect a complex population history  
341 of SCT and Taiwan itself after origination and mountain building of the island that  
342 occurred around late Miocene (9 Ma) and 5–6 Ma, respectively<sup>25</sup>. The availability of  
343 the SCT genome will help the development of precise genetic monitoring and tree  
344 management for the survival of SCT's natural populations.

345  
346 The placement of SCT as sister to the eudicots has important implications for  
347 comparative genomic analyses of evolutionary innovations within the eudicots, which  
348 comprise ca. 75% of extant flowering plants<sup>48</sup>. For example, the SCT genome will  
349 serve as an important reference outgroup for reconstructing the timing and nature of  
350 polyploidy event that gave rise to the hexaploid ancestor of all core eudicots  
351 (Pentapetalae)<sup>49,50</sup>. Within the magnoliids we identified the timing of two independent  
352 rounds of WGD events that contributed to gene family expansions and innovations in  
353 pathogen, herbivore and mutualistic interactions.

354  
355 Gene tree topologies for each of the six angiosperm TPS subfamilies revealed  
356 diversification of TPS genes and gene function in the ancestry of SCT. The C20s  
357 producing TPS-f genes were suggested to be eudicot-specific because both rice and  
358 sorghum lack genes in this subfamily<sup>45</sup>. Our data clearly indicate that this subfamily  
359 was present in the last common ancestor of all but was lost from the grass family (Table  
360 2). Massive diversification of the TPS-a and TPS-b subfamilies within the Lauraceae is  
361 consistent with a previous report that the main constituents of 58 essential oils produced  
362 in *Cinnamomum* leaves are C10s and C15s<sup>47</sup>. These findings are in congruent with the  
363 fact that fruiting bodies of the SCT-specific parasitic fungus, *Antrodia cinnamomea*,  
364 can produce 78 kinds of terpenoids, including 31 structure-different triterpenoids  
365 (C30s)<sup>51</sup>, many of which are synthesized via the mevalonate pathway as are C10s and  
366 C15s followed by cyclizing squalenes (C<sub>30</sub>H<sub>50</sub>) into the skeletons of C30s<sup>52</sup>. It is  
367 reasonable to suggest that this fungus obtained intermediate compounds through  
368 decomposing trunk matters from SCT.

369  
370 The 101 *CkTPSs* identified in the SCT genome are unevenly distributed across the 12  
371 chromosomal scaffolds, and tandem arrays include gene clusters from the same  
372 subfamily (Supplementary Fig. 26). In the *Drosophila melanogaster* genome, “tandem

373 duplicate overactivity” has been observed with tandemly duplicated *Adh* genes  
374 showing 2.6-fold greater expression than single copy *Adh* genes<sup>53</sup>.

375

376 In summary, the availability of SCT genome establishes a valuable genomic  
377 foundation that will help unravel the genetic diversity and evolution of other  
378 magnoliids, and a better understanding of flowering plant genome evolution and  
379 diversification. At the same time, the reference-quality SCT genome sequence will  
380 enable efforts to conserve genome-wide genetic diversity in this culturally and  
381 economically important tree species.

382

383

384

385

## 386 **Methods**

387

### 388 **Plant Materials**

389 All plant materials used in this study were collected from a 12-year-old SCT growing  
390 in Ershui Township, Changhua County, Taiwan (23°49'25.9"N, 120°36'41.2"E) during  
391 April to July of 2014–2016. The tree was grown up from a seedling obtained from  
392 Forestry Management Section, Department of Agriculture, Taoyuan City. The  
393 specimen (voucher number: Chaw 1501) was deposited in the Herbarium of  
394 Biodiversity Research Center, Academia Sinica, Taipei, Taiwan (HAST).

395

### 396 **Genomic DNA extraction and sequencing**

397 We used a modified high-salt method<sup>54</sup> to eliminate the high content of  
398 polysaccharides in SCT leaves, followed by total DNA extraction with a modified  
399 CTAB method<sup>55</sup>. Three approaches were employed in DNA sequencing. First,  
400 paired-end and mate-pair libraries were constructed using the Illumina TruSeq DNA  
401 HT Sample Prep Kit and Illumina Nextera Mate Pair Sample Prep Kit following the  
402 kit’s instructions, respectively. All obtained libraries were sequenced on an Illumina  
403 NextSeq 500 platform to generate ca. 278.8 Gb of raw data. Second, SMRT libraries  
404 were constructed using the PacBio 20-Kb protocol (<https://www.pacb.com/>). After  
405 loading on SMRT cells (SMRT™ Cell 8 Pac), these libraries were sequenced on a  
406 PacBio RS-II instrument using P6 polymerase and C4 sequencing reagent (Pacific  
407 Biosciences, Menlo Park, California). Third, a Chicago library was prepared by  
408 Dovetail Genomics (Santa Cruz, California) and sequenced on an Illumina HiSeq 2500  
409 to generate 150 bp read pairs. Supplementary Table 1 summarizes the coverage and  
410 information for the sequencing data.

411

### 412 **RNA extraction and sequencing**

413 Opening flowers, flower buds (two stages), immature leaves, young leaves, mature  
414 leaves, young stems, and fruits were collected from the same individual  
415 (Supplementary Fig. 1c) and their total RNAs were extracted<sup>56</sup>. The extracted RNA  
416 was purified using poly-T oligo-attached magnetic beads. All transcriptome libraries  
417 were constructed using Illumina TruSeq library Stranded mRNA Prep Kit and  
418 sequenced on an Illumina HiSeq 2000 platform. A summary of transcriptome data is  
419 shown in Supplementary Table 2.

420

### 421 **Chromosome number assessment**

422 Root tips from cutting seedlings were used to examine the chromosome number based  
423 on Suen *et al.*'s method<sup>57</sup>. The stained samples were observed under a Nikon Eclipse  
424 90i microscope (Supplementary Fig. 1a).

425

### 426 **Genome size estimation**

427 Fresh leaves of SCT were cut into tiny pieces and mixed well with 1 mL isolation  
428 buffer (200 mM Tris, 4 mM MgCl<sub>2</sub>-6H<sub>2</sub>O, and 0.5% Triton X-100)<sup>58</sup>. The mixture  
429 was filtered through a 42 µm nylon mesh, followed by incubation of the filtered  
430 suspensions with a DNA fluorochrome (50 µg/ml propidium iodide and 50 µg/ml  
431 RNase). The genome size was estimated using a MoFlo XDP flow cytometry  
432 (Beckman Coulter Life Science, Indianapolis, Indiana) with chicken erythrocyte and  
433 rice nuclei (BioSure, Grass Valley, California) as the internal standards  
434 (Supplementary Fig. 1b). Estimate of genome size from Illumina paired end  
435 sequences was inferred using Genomescope<sup>59</sup> (based on k-mer 31).

436

### 437 ***De novo* assembly of SCT**

438 Illumina paired end and mate pair reads were trimmed with Trimmomatic<sup>60</sup> (ver. 0.32;  
439 options LEADING:30 TRAILING:30 SLIDINGWINDOW:4:30 MINLEN:50) and  
440 subsequently assembled using Platanus<sup>61</sup>. Pacbio reads were assembled using the  
441 FALCON<sup>62</sup> assembler and the consensus sequences were improved using Quiver<sup>63</sup>.  
442 The Pacbio assembly was scaffolded using HiRISE scaffolder and consensus  
443 sequences were further improved using Pilon with one iteration<sup>64</sup>. The genome  
444 completeness was assessed using plant dataset of BUSCO<sup>22</sup> (ver. 3.0.2). To identify  
445 putative telomeric repeats, the assembly was searched for high copy number repeats  
446 less than 10 base pairs using tandem repeat finder<sup>65</sup> (ver. 4.09; options: 2 7 7 80 10 50  
447 500). The heptamer TTTAGGG was identified (Supplementary Table 6).

448

449

#### 450 **Gene predictions and functional annotation**

451 Transcriptome paired end reads were aligned to the genome using STAR<sup>66</sup>.  
452 Transcripts were identified using two approaches: i) assembled *de novo* using  
453 Trinity<sup>67</sup>, ii) reconstructed using Stringtie<sup>68</sup> or CLASS2<sup>69</sup>. Transcripts generated from  
454 Trinity were remapped to the reference using GMAP<sup>70</sup>. The three sets of transcripts  
455 were merged and filtered using MIKADO (<https://github.com/lucventurini/mikado>).  
456 Proteomes from representative reference species (Uniprot plants; Proteomes of  
457 *Amborella trichopoda* and *Arabidopsis thaliana*) were downloaded from Phytozome  
458 (ver. 12.1; <https://phytozome.jgi.doe.gov/>). The gene predictor Augustus<sup>71</sup> (ver. 3.2.1)  
459 and SNAP<sup>72</sup> were trained either on the gene models data using BRAKER1<sup>73</sup> or  
460 MAKER2<sup>20</sup>. The assembled transcripts, reference proteomes, BRAKER1 and the  
461 BUSCO predictions were combined as evidence hints for input of the MAKER2<sup>20</sup>  
462 annotation pipeline. MAKER2<sup>20</sup> invoked the two trained gene predictors to generate a  
463 final set of gene annotation. Amino acid sequences of the proteome were functionally  
464 annotated using Blast2GO<sup>74</sup> and eggno-mapper<sup>21</sup>. Nuclear plastid DNAs (NUPT) of  
465 SCT was searched against its plastid genome (plastome; KR014245<sup>75</sup>) using blastn  
466 (parameters were followed from ref<sup>76</sup>).

467

#### 468 **Analysis of genome heterozygosity**

469 Paired end reads of SCT was aligned to reference using bwa mem<sup>77</sup> (ver.  
470 0.7.17-r1188). PCR duplicates were removed using samtools<sup>78</sup> (ver. 1.8).  
471 Heterozygous bi-allelic SNPs were called using samtools<sup>78</sup> and consensus sequences  
472 were generated using bcftools<sup>79</sup> (ver. 1.7). Depth of coverage and minor allele  
473 frequency plots were conducted using R ver. 3.4.2. Consensus sequence was fed to  
474 the PSMC program<sup>24</sup> to infer past effective population size. All of the parameters used  
475 for the PSMC program were at default with the exception of -u 7.5e-09 taken from *A.*  
476 *thaliana*<sup>80</sup> and -g 20 taken from *Neolitsea sericea* (Lauraceae)<sup>81</sup>.

477

#### 478 **Identification of repetitive elements**

479 Repetitive elements were firstly identified by modeling the repeats using  
480 RepeatModeler<sup>82</sup> and then searched and quantified repeats using RepeatMasker<sup>83</sup>.  
481 Repeat types modeled as “Unknown” by RepeatModeler were further annotated using  
482 TEclass<sup>84</sup>. Tandem Repeats were identified using Tandem Repeats Finder<sup>65</sup>. The  
483 proportions of different types of repeats were quantified by dissecting the 12 largest  
484 scaffolds into 100,000 bp chunks and calculating the total lengths and percentages of  
485 the repetitive elements within the chunks. LTR-RT domains were extracted following  
486 Guan *et al.*'s method<sup>85</sup>. Briefly, a two-step procedure was applied on the genomes.

487 The first was to find candidate LTR-RTs similar to known reverse transcriptase  
488 domains and second was to identify other LTR-RTs using the candidates identified in  
489 the first step. The identified LTR-RT domains were integrated with those downloaded  
490 from the Ty1/Copia and Ty3/Gypsy trees of Guan *et al.*<sup>85</sup>. Trees were built by  
491 aligning the sequences using MAFFT<sup>87</sup> (ver. 7.310; --genafpair --ep 0) and applied  
492 FastTree<sup>88</sup> with JTT model on the aligned sequences, and were colored using APE  
493 package<sup>89</sup>.

494

#### 495 **Gene family / Orthogroup inference and analysis of protein domains**

496 The amino acid and nucleotide sequences of 12 representative plant species were  
497 downloaded from various sources: *Aquilegia coerulea*, *Arabidopsis thaliana*, *Daucus*  
498 *carota*, *Mimulus guttatus*, *Musa acuminata*, *Oryza sativa japonica*, *Populus*  
499 *trichocarpa*, *Vitis vinifera* and *Zea mays* from Phytozome (ver. 12.1;  
500 <https://phytozome.jgi.doe.gov/>), *Picea abies* from the Plant Genome Integrative  
501 Explorer Resource<sup>90</sup> (<http://plantgenie.org/>), *Ginkgo biloba* from GigaDB<sup>91</sup>, and  
502 *Amborella trichopoda* from Ensembl plants<sup>92</sup> (Release 39;  
503 <https://plants.ensembl.org/index.html>). Gene families or orthologous groups of these  
504 species and SCT were determined by OrthoFinder<sup>23</sup> (ver. 2.2.0). Protein family  
505 domains (Pfam) of each species were calculated from Pfam website (ver. 31.0;  
506 <https://pfam.xfam.org/>). Pfam numbers of every species were transformed into  
507 z-scores. Significant expansion or reduction of Pfams in SCT were based on its  
508 z-score greater than 1.96 or less than -1.96, respectively. The significant Pfams were  
509 sorted by Pfam numbers (Supplementary Fig. 16). Gene family expansion and loss  
510 were inferred using CAFE<sup>41</sup> (ver. 4.1 with input tree as the species tree inferred from  
511 the single copy orthologues).

512

#### 513 **Phylogenetic analysis**

514 MAFFT<sup>87</sup> (ver. 7.271; option --maxiterate 1000) was used to align 13 sets of amino  
515 acid sequences of 211 single-copy OGs. Each OG alignment was used to compute a  
516 maximum likelihood phylogeny using RAxML<sup>30</sup> (ver. 8.2.11; options: -m  
517 PROTGAMMAILGF -f a) with 500 bootstrap replicates. The best phylogeny and  
518 bootstrap replicates for each gene were used to infer a consensus species tree using  
519 ASTRAL-III<sup>31</sup>. A maximum likelihood phylogeny was constructed with the  
520 concatenated amino acid alignments of the single copy OGs (ver. 8.2.11; options: -m  
521 PROTGAMMAILGF -f a) also with 500 bootstrap replicates.

522

#### 523 **Estimation of divergence time**

524 Divergence time of each tree node was inferred using MCMCtree of PAML<sup>32</sup> package  
525 (ver. 4.9g; options: correlated molecular clock, JC69 model and rest being default).  
526 The final species tree and the concatenated translated nucleotide alignments of 211  
527 single-copy-orthologs were used as input of MCMCtree. The phylogeny was  
528 calibrated using various fossil records or molecular divergence estimate by placing  
529 soft bounds at split node of: i) *A. thaliana*-*V. vinifera* (115–105 Ma)<sup>93</sup>, ii) *M.*  
530 *acuminata*-*Z. mays* (115–90 Ma)<sup>93</sup>, iii) Ranunculales (128.63–119.6 Ma)<sup>34</sup>, iv)  
531 Angiospermae (247.2–125 Ma)<sup>34</sup>, v) Acrogymnospermae (365.629–308.14 Ma)<sup>34</sup>, and  
532 v) a hard bound of 420 Ma of outgroup *P. patens*<sup>94</sup>.

533

### 534 **Analysis of genome synteny and whole genome duplication**

535 Dot plots between SCT and *A. trichopoda* assemblies were produced using SynMap  
536 from Comparative Genomics Platform (Coge<sup>95</sup>) to visualize the paleoploidy level of  
537 SCT. Synteny blocks within SCT and between *A. trichopoda* and *A. coerulea* were  
538 identified using DAGchainer<sup>96</sup> (same parameters as Coge<sup>95</sup>: -E 0.05 -D 20 -g 10 -A 5).  
539 Ks between syntenic group pairs were calculated using the DECIPHER<sup>97</sup> package in  
540 R. Depth of the inferred syntenic blocks were calculated using Bedtools<sup>98</sup>. Both the  
541 Ks distribution and syntenic block depth were used to determine the paleopolyploidy  
542 level<sup>99</sup> of SCT. Using the quadruplicate or triplicate orthologues in the syntenic  
543 blocks as backbones, as well as *A. trichopoda* regions showing up to four syntenic  
544 regions, we identified the start and end coordinates of linkage clusters (Supplementary  
545 Note).

546

### 547 **Resistance (R) genes**

548 R genes were identified based on the ref<sup>100</sup>. Briefly, the predicted genes of the 13  
549 sampled species were searched for the Pfam NBS (NB-ARC) protein family  
550 (PF00931) using HMMER ver. 3.1b2<sup>101</sup> with an e-value cutoff of 1e-5. Extracted  
551 sequences were then checked for protein domains using InterproScan<sup>102</sup> (ver.  
552 5.19-58.0) to remove false positive NB-ARC domain hits. The NBS domains of the  
553 genes that passed both HMMER and InterproScan were extracted according to the  
554 InterproScan annotation and aligned using MAFFT<sup>87</sup> (ver. 7.310; --genafpair --ep 0);  
555 the alignment was then input into FastTree<sup>88</sup> with the JTT model and visualized using  
556 EvolView<sup>103</sup>.

557

### 558 **Terpene synthase genes**

559 In addition to the 13 species' proteome dataset used in this study, transcriptome data  
560 from one Chloranthaceae species, *Sarcandra glabra* and two magnollids  
561 representatives, *Persea americana* (avocado) and *Saruma henryi* (saruma), were

562 downloaded from oneKP transcriptome database<sup>104</sup>. Previously annotated TPS genes of  
563 four species: *Arabidopsis thaliana*<sup>105</sup>, *Oryza sativa*<sup>45</sup>, *Populus trichocarpa*<sup>106</sup>, and *Vitis*  
564 *vinifera*<sup>107</sup> were retrieved. For species without *a priori* TPS annotations, two Pfam  
565 domains: PF03936 and PF01397, were used to identify against the proteomes using  
566 HMMER<sup>108</sup> (ver. 3.0; cut-off at e-values < 10<sup>-5</sup>). Sequence lengths shorter than 200  
567 amino acids were excluded from further analysis. 702 putative or annotated protein  
568 sequences of *TPS* were aligned using MAFFT<sup>87</sup> (ver. 7.310 with default parameters)  
569 and manually adjusted using MEGA<sup>109</sup> (ver. 7.0). The TPS gene tree was constructed  
570 using FastTree<sup>110</sup> (ver. 2.1.0) with 1,000 bootstrap replicates. Subfamily TPS-c was  
571 designated as the outgroup. Branching nodes with bootstrap values < 80% were treated  
572 as collapsed.

573  
574

## 575 **Figure and Table legends**

576

577 **Figure 1| Stout camphor tree genome heterozygosity. a**, Number of heterozygous  
578 bi-allelic SNPs per 100 kb non-overlapping windows is plotted along the largest 12  
579 scaffolds. Indels were excluded. **b**, The history of effective population size was  
580 inferred using the PSMC method. 100 bootstraps were performed and the margins are  
581 shown in light red.

582

583 **Figure 2| Genomic landscape of stout camphor tree chromosome 1.** For every  
584 non-overlapping 100 kb window distribution is shown from top to bottom: gene  
585 density (percent of nucleotide with predicted model), transcriptome (percent of  
586 nucleotides with evidence of transcriptome mapping), three different classes repetitive  
587 sequences (percent of nucleotides with TE annotation) and heterozygosity (number of  
588 bi-allelic SNPs). The red T letter denote presence of telomeric repeat cluster at  
589 scaffold end.

590

591 **Figure 3| A species tree on the basis of 211 single copy orthologues from 13**  
592 **plant species.** Gene family expansion and contraction are denoted in numbers next to  
593 plus and minus signs, respectively. Unless stated, bootstrap support of 100 is denoted  
594 as blue circles.

595

596 **Figure 4| Evolutionary analysis of the stout camphor tree genome. a**, Schematic  
597 representation of intragenomic relationship amongst the 637 synteny blocks in the  
598 stout camphor tree genome. Synteny blocks assigned unambiguously into 5 linkage  
599 clusters representing ancient karyotypes are color coded. **b**, Schematic representation



600 of the first linkage group within the stout camphor tree genome and their  
601 corresponding relationship in *A. trichopoda*.

602

603 **Figure 5| Density plots of synonymous substitutions (Ks) of stout camphor tree**  
604 **genome and other plant species. a,** Pairwise orthologue duplicates identified in  
605 synteny blocks within SCT, within *A. coerulea* and between SCT and *A. coerulea*. **b,**  
606 Ks of intragenomic pairwise duplicates of the Lauraceae and the Magnoliales in the  
607 1KP project<sup>104</sup>. Dashed lines denote the two Ks peaks observed in SCT.

608

609 **Figure 6| Phylogenetic tree of putative or characterized TPS genes from the 13**  
610 **sequenced land plant genomes and two magnoliids with available transcriptomic**  
611 **data.**

612

613 **Table 1| Statistics of stout camphor tree genome assemblies using different**  
614 **sequencing technologies and final gene predictions.**

615

616 **Table 2| Comparison of the known/predicted seven TPS subfamilies among 14**  
617 **known genomes and three available transcriptomes of major seed plant lineages.**

618

619

#### 620 **Authors contribution**

621 Conceived the study: S.M.C

622 Genome assembly and annotation: I.J.T and H.M.K

623 Repeat Analysis: L.Y.C and Y.W.W

624 Plastid DNA analysis: E.S.

625 Conducted the experiments: C.S.W, L.N.W, H.T.Y., C.Y.H and S.M.C.

626 Comparative genomics analysis: I.J.T, Y.L, H.M.K, C.Y.I.L and J.L.M

627 Analysis of R genes: Y.W.W, M.H.H, K.P.W, S.M.C

628 Analysis of terpene gene family: H.Y.W, S.M.C, C.Y.H and Y.W.W

629 Wrote the manuscript: I.J.T, J.LM and S.M.C

630

#### 631 **Data availability**

632 All of raw sequence reads used in this study have been deposited in NCBI under the  
633 BioProject accession number PRJNA477266. The assembly and annotation of SCT is  
634 available under the accession number SAMN09509728.

635

636

#### 637 **Acknowledgement**

638 Chi-yuan Tsai for plant materials; Chih-Ming Hung for PSMC analysis. S.M.C was  
639 funded by Investigators' Award and Central Academic Committee, Academia Sinica.  
640 I.J.T was funded by Career Development Award, Academia Sinica. H.M.K, C.S.W  
641 and C.Y.H were funded by postdoctoral fellowship, Academia Sinica.  
642

## 643 **References**

- 644
- 645 1 Jayaprakasha, G. K., Rao, L. J. & Sakariah, K. K. Chemical composition of  
646 volatile oil from *Cinnamomum zeylanicum* buds. *Z Naturforsch C* **57**, 990–993  
647 (2002).
  - 648 2 Joshi, R., Satyal, P. & Setzer, W. Himalayan Aromatic medicinal plants: a  
649 review of their ethnopharmacology, volatile phytochemistry, and biological  
650 activities. *Medicines* **3**, doi:10.3390/medicines3010006 (2016).
  - 651 3 Kaul, P. N., Bhattacharya, A. K., Rajeswara Rao, B. R., Syamasundar, K. V. &  
652 Ramesh, S. Volatile constituents of essential oils isolated from different parts  
653 of cinnamon (*Cinnamomum zeylanicum* Blume). *J Sci Food and Agric* **83**, 53–  
654 55, doi:10.1002/jsfa.1277 (2003).
  - 655 4 Shahlari, M., Hamidpour, M., Hamidpour, S. & Hamidpour, R. Camphor  
656 (*Cinnamomum camphora*), a traditional remedy with the history of treating  
657 several diseases. *Int J Case Rep Images* **4**,  
658 doi:10.5348/ijcri-2013-02-267-RA-1 (2013).
  - 659 5 Christenhusz, M. J. M. & Byng, J. W. The number of known plants species in  
660 the world and its annual increase. *Phytotaxa* **261**,  
661 doi:10.11646/phytotaxa.261.3.1 (2016).
  - 662 6 Palmer, J. D., Soltis, D. E. & Chase, M. W. The plant tree of life: an overview  
663 and some points of view. *Am J Bot* **91**, 1437–1445,  
664 doi:10.3732/ajb.91.10.1437 (2004).
  - 665 7 Cui, L. *et al.* Widespread genome duplications throughout the history of  
666 flowering plants. *Genome Res* **16**, 738–749, doi:10.1101/gr.4825606 (2006).
  - 667 8 Liu, Y. C., Lu, F. Y. & Ou, C. H. Trees of Taiwan. *Monographic Publication* **7**,  
668 105–131 (1988).
  - 669 9 Fujita, Y. Classification and phylogeny of the genus *Cinnamomum* viewed  
670 from the constituents of essential oils. *Shokubutsugaku Zasshi* **80**, 261–271,  
671 doi:10.15281/jplantres1887.80.261 (1967).
  - 672 10 Chang, T. T. & Chou, W. N. *Antrodia cinnamomea* sp. nov. on *Cinnamomum*  
673 *kanehirai* in Taiwan. *Mycol Res* **99**, 756–758,  
674 doi:https://doi.org/10.1016/S0953-7562(09)80541-8 (1995).
  - 675 11 Wu, S. H., Ryvardeen, L. & Chang, T. T. *Antrodia camphorata*

- 676 ("niu-chang-chih"), new combination of a medicinal fungus in Taiwan. *Bot*  
677 *Stud* **38**, 273–275 (1997).
- 678 12 Hseu, Y. C., Chen, S. C., Yech, Y. J., Wang, L. & Yang, H. L. Antioxidant  
679 activity of *Antrodia camphorata* on free radical-induced endothelial cell  
680 damage. *J Ethnopharmacol* **118**, 237–245, doi:10.1016/j.jep.2008.04.004  
681 (2008).
- 682 13 Liao, P. C. *et al.* Historical spatial range expansion and a very recent  
683 bottleneck of *Cinnamomum kanehirae* Hay. (Lauraceae) in Taiwan inferred  
684 from nuclear genes. *BMC Evol Biol* **10**, 124, doi:10.1186/1471-2148-10-124  
685 (2010).
- 686 14 Hung, K. H., Lin, C. H., Shih, H. C., Chiang, Y. C. & Ju, L. P. Development,  
687 characterization and cross-species amplification of new microsatellite primers  
688 from an endemic species *Cinnamomum kanehirae* (Lauraceae) in Taiwan.  
689 *Conserv Genet Resour* **6**, 911–913, doi:10.1007/s12686-014-0239-z (2014).
- 690 15 Zerbe, P. & Bohlmann, J. Plant diterpene synthases: exploring modularity and  
691 metabolic diversity for bioengineering. *Trends Biotechnol* **33**, 419–428,  
692 doi:10.1016/j.tibtech.2015.04.006 (2015).
- 693 16 Loreto, F., Dicke, M., Schnitzler, J. P. & Turlings, T. C. Plant volatiles and the  
694 environment. *Plant Cell Environ* **37**, 1905–1908, doi:10.1111/pce.12369  
695 (2014).
- 696 17 Tholl, D. Biosynthesis and biological functions of terpenoids in plants. *Adv*  
697 *Biochem Eng Biotechnol* **148**, 63–106, doi:10.1007/10\_2014\_295 (2015).
- 698 18 Gonzalez-Coloma, A., Reina, M., Diaz, C. E. & Fraga, B. M. in  
699 *Comprehensive Natural Products II* (eds Liu, H. W. & Mander, L.) 237–268  
700 (Elsevier, 2010).
- 701 19 Putnam, N. H. *et al.* Chromosome-scale shotgun assembly using an in vitro  
702 method for long-range linkage. *Genome Res* **26**, 342–350,  
703 doi:10.1101/gr.193474.115 (2016).
- 704 20 Holt, C. & Yandell, M. MAKER2: an annotation pipeline and  
705 genome-database management tool for second-generation genome projects.  
706 *BMC bioinformatics* **12**, 491, doi:10.1186/1471-2105-12-491 (2011).
- 707 21 Huerta-Cepas, J. *et al.* Fast genome-wide functional annotation through  
708 orthology assignment by eggNOG-mapper. *Mol Biol Evol* **34**, 2115–2122  
709 doi:10.1093/molbev/msx148 (2017).
- 710 22 Simão, F. A., Waterhouse, R. M., Ioannidis, P., Kriventseva, E. V. & Zdobnov,  
711 E. M. BUSCO: assessing genome assembly and annotation completeness with  
712 single-copy orthologs. *Bioinformatics* **31**, 3210–3212,  
713 doi:10.1093/bioinformatics/btv351 (2015).

- 714 23 Emms, D. M. & Kelly, S. OrthoFinder: solving fundamental biases in whole  
715 genome comparisons dramatically improves orthogroup inference accuracy.  
716 *Genome Biol* **16**, 157, doi:10.1186/s13059-015-0721-2 (2015).
- 717 24 Li, H. & Durbin, R. Inference of human population history from individual  
718 whole-genome sequences. *Nature* **475**, 493–496, doi:10.1038/nature10231  
719 (2011).
- 720 25 Sibuet, J.-C. & Hsu, S.-K. How was Taiwan created? *Tectonophysics* **379**,  
721 159–181, doi:10.1016/j.tecto.2003.10.022 (2004).
- 722 26 Dong, P. *et al.* 3D Chromatin architecture of large plant genomes determined  
723 by local A/B Compartments. *Mol Plant* **10**, 1497–1509,  
724 doi:10.1016/j.molp.2017.11.005 (2017).
- 725 27 Watson, J. M. & Riha, K. Comparative biology of telomeres: where plants  
726 stand. *FEBS Lett* **584**, 3752–3759, doi:10.1016/j.febslet.2010.06.017 (2010).
- 727 28 Zeng, L. *et al.* Resolution of deep angiosperm phylogeny using conserved  
728 nuclear genes and estimates of early divergence times. *Nat Commun* **5**, 4956,  
729 doi:10.1038/ncomms5956 (2014).
- 730 29 An update of the Angiosperm Phylogeny Group classification for the orders  
731 and families of flowering plants: APG IV. *Bot J Linear Soc* **181**, 1–20,  
732 doi:doi:10.1111/boj.12385 (2016).
- 733 30 Stamatakis, A. RAxML-VI-HPC: maximum likelihood-based phylogenetic  
734 analyses with thousands of taxa and mixed models. *Bioinformatics (Oxford,*  
735 *England)* **22**, 2688–2690, doi:10.1093/bioinformatics/btl446 (2006).
- 736 31 Mirarab, S. & Warnow, T. ASTRAL-II: coalescent-based species tree  
737 estimation with many hundreds of taxa and thousands of genes. *Bioinformatics*  
738 **31**, 44–52, doi:10.1093/bioinformatics/btv234 (2015).
- 739 32 Yang, Z. PAML 4: phylogenetic analysis by maximum likelihood. *Mol Biol*  
740 *Evol* **24**, 1586–1591, doi:10.1093/molbev/msm088 (2007).
- 741 33 Massoni, J., Couvreur, T. L. & Sauquet, H. Five major shifts of diversification  
742 through the long evolutionary history of Magnoliidae (angiosperms). *BMC*  
743 *Evol Biol* **15**, 49, doi:10.1186/s12862-015-0320-6 (2015).
- 744 34 Morris, J. L. *et al.* The timescale of early land plant evolution. *Proc Natl Acad*  
745 *Sci USA* **115**, E2274–E2283, doi:10.1073/pnas.1719588115 (2018).
- 746 35 Zhong, B. & Betancur-R, R. Expanded taxonomic sampling coupled with gene  
747 genealogy interrogation provides unambiguous resolution for the evolutionary  
748 root of angiosperms. *Genome Biol Evol* **9**, 3154–3161,  
749 doi:10.1093/gbe/evx233 (2017).
- 750 36 Matasci, N. *et al.* Data access for the 1,000 Plants (1KP) project. *GigaScience*  
751 **3**, doi:10.1186/2047-217x-3-17 (2014).

- 752 37 Finn, R. D. *et al.* Pfam: the protein families database. *Nucleic Acids Res* **42**,  
753 D222–230, doi:10.1093/nar/gkt1223 (2014).
- 754 38 Lang, T. *et al.* Protein domain analysis of genomic sequence data reveals  
755 regulation of LRR related domains in plant transpiration in *Ficus*. *PLoS One* **9**,  
756 e108719, doi:10.1371/journal.pone.0108719 (2014).
- 757 39 Jourda, C. *et al.* Expansion of banana (*Musa acuminata*) gene families  
758 involved in ethylene biosynthesis and signalling after lineage-specific  
759 whole-genome duplications. *New Phytol* **202**, 986–1000,  
760 doi:10.1111/nph.12710 (2014).
- 761 40 Seyfferth, C. *et al.* Ethylene-related gene expression networks in wood  
762 formation. *Front Plant Sci* **9**, 272, doi:10.3389/fpls.2018.00272 (2018).
- 763 41 De Bie, T., Cristianini, N., Demuth, J. P. & Hahn, M. W. CAFE: a  
764 computational tool for the study of gene family evolution. *Bioinformatics* **22**,  
765 1269–1271, doi:10.1093/bioinformatics/btl097 (2006).
- 766 42 Dodds, P. N. *et al.* Direct protein interaction underlies gene-for-gene  
767 specificity and coevolution of the flax resistance genes and flax rust avirulence  
768 genes. *Proc Natl Acad Sci USA* **103**, 8888–8893,  
769 doi:10.1073/pnas.0602577103 (2006).
- 770 43 Trapp, S. C. & Croteau, R. B. Genomic organization of plant terpene synthases  
771 and molecular evolutionary implications. *Genetics* **158**, 811–832 (2001).
- 772 44 Gershenzon, J. & Dudareva, N. The function of terpene natural products in the  
773 natural world. *Nat Chem Biol* **3**, 408, doi:10.1038/nchembio.2007.5 (2007).
- 774 45 Chen, F., Tholl, D., Bohlmann, J. & Pichersky, E. The family of terpene  
775 synthases in plants: a mid-size family of genes for specialized metabolism that  
776 is highly diversified throughout the kingdom. *Plant J* **66**, 212–229,  
777 doi:10.1111/j.1365-313X.2011.04520.x (2011).
- 778 46 Martin, D. M., Fäldt, J. & Bohlmann, J. Functional characterization of nine  
779 Norway Spruce *TPS* genes and evolution of gymnosperm terpene synthases of  
780 the *TPS-d* Subfamily. *Plant Physiol* **135**, 1908–1927,  
781 doi:10.1104/pp.104.042028 (2004).
- 782 47 Cheng, S.-S. *et al.* Chemical polymorphism and composition of leaf essential  
783 oils of *Cinnamomum kanehirae* using gas chromatography/mass spectrometry,  
784 cluster analysis, and principal component analysis. *J Wood Chem Tech* **35**,  
785 207–219, doi:10.1080/02773813.2014.924967 (2015).
- 786 48 Liping, Z. *et al.* Resolution of deep eudicot phylogeny and their temporal  
787 diversification using nuclear genes from transcriptomic and genomic datasets.  
788 *New Phytol* **214**, 1338–1354, doi:doi:10.1111/nph.14503 (2017).
- 789 49 Jiao, Y. *et al.* A genome triplication associated with early diversification of the

790 core eudicots. *Genome Biol* **13**, R3–R3, doi:10.1186/gb-2012-13-1-r3 (2012).

791 50 Chanderbali, A. S., Berger, B. A., Howarth, D. G., Soltis, D. E. & Soltis, P. S.  
792 Evolution of floral diversity: genomics, genes and gamma. *Philos Trans R Soc*  
793 *Lond B Biol Sci* **372**, doi:10.1098/rstb.2015.0509 (2017).

794 51 Geethangili, M. & Tzeng, Y. M. Review of pharmacological effects of  
795 *Antrodia camphorata* and its bioactive compounds. *Evidence-Based*  
796 *Complement Alternat Med* **2011**, 17, doi:10.1093/ecam/nep108 (2011).

797 52 Lu, M. Y. *et al.* Genomic and transcriptomic analyses of the medicinal fungus  
798 *Antrodia cinnamomea* for its metabolite biosynthesis and sexual development.  
799 *Proc Natl Acad Sci USA* **111**, E4743–4752, doi:10.1073/pnas.1417570111  
800 (2014).

801 53 Loehlin, D. W. & Carroll, S. B. Expression of tandem gene duplicates is often  
802 greater than twofold. *Proc Natl Acad Sci USA* **113**, 5988–5992,  
803 doi:10.1073/pnas.1605886113 (2016).

804 54 Sandbrink, J. M., Vellekoop, P., Vanham, R. & Vanbrederode, J. A method for  
805 evolutionary studies on RFLP of chloroplast DNA, applicable to a range of  
806 plant species. *Biochem Syst Ecol* **17**, 45–49, doi:Doi  
807 10.1016/0305-1978(89)90041-0 (1989).

808 55 Doyle, J. J. & Doyle, J. L. A rapid DNA isolation procedure for small  
809 quantities of fresh leaf tissue. *Phytochemical Bulletin* **19**, 11–15,  
810 doi:citeulike-article-id:678648 (1987).

811 56 Kolosova, N., Gorenstein, N., Kish, C. M. & Dudareva, N. Regulation of  
812 circadian methyl benzoate emission in diurnally and nocturnally emitting  
813 plants. *Plant Cell* **13**, 2333–2347 (2001).

814 57 Suen, D. F. *et al.* Assignment of DNA markers to *Nicotiana sylvestris*  
815 chromosomes using monosomic alien addition lines. *Theor Appl Genet* **94**,  
816 331–337, doi:DOI 10.1007/s001220050420 (1997).

817 58 Dolezel, J., Greilhuber, J. & Suda, J. Estimation of nuclear DNA content in  
818 plants using flow cytometry. *Nat Protoc* **2**, 2233–2244,  
819 doi:10.1038/nprot.2007.310 (2007).

820 59 Vurture, G. W. *et al.* GenomeScope: fast reference-free genome profiling from  
821 short reads. *Bioinformatics* **33**, 2202–2204, doi:10.1093/bioinformatics/btx153  
822 (2017).

823 60 Bolger, A. M., Lohse, M. & Usadel, B. Trimmomatic: a flexible trimmer for  
824 Illumina sequence data. *Bioinformatics (Oxford, England)*, 1–7,  
825 doi:10.1093/bioinformatics/btu170 (2014).

826 61 Kajitani, R. *et al.* Efficient de novo assembly of highly heterozygous genomes  
827 from whole-genome shotgun short reads. *Genome res* **24**, 1384–1395,

- 828 doi:10.1101/gr.170720.113 (2014).
- 829 62 Chin, C. S. *et al.* Phased diploid genome assembly with single-molecule  
830 real-time sequencing. *Nat Methods* **13**, 1050–1054, doi:10.1038/nmeth.4035  
831 (2016).
- 832 63 Chin, C. S. *et al.* Nonhybrid, finished microbial genome assemblies from  
833 long-read SMRT sequencing data. *Nat Methods* **10**, 563–569,  
834 doi:10.1038/nmeth.2474 (2013).
- 835 64 Walker, B. J. *et al.* Pilon: an integrated tool for comprehensive microbial  
836 variant detection and genome assembly improvement. *PLoS ONE* **9**, e112963,  
837 doi:10.1371/journal.pone.0112963 (2014).
- 838 65 Benson, G. Tandem repeats finder: a program to analyze DNA sequences.  
839 *Nucleic Acids Res* **27**, 573–580 (1999).
- 840 66 Dobin, A., Davis, C. & Schlesinger, F. STAR: ultrafast universal RNA-seq  
841 aligner. *Bioinformatics*, 1–7 (2013).
- 842 67 Haas, B. J. *et al.* De novo transcript sequence reconstruction from RNA-seq  
843 using the Trinity platform for reference generation and analysis. *Nat Protoc* **8**,  
844 1494–1512, doi:10.1038/nprot.2013.084 (2013).
- 845 68 Pertea, M. *et al.* StringTie enables improved reconstruction of a transcriptome  
846 from RNA-seq reads. *Nat Biotechnol* **33**, 290–295, doi:10.1038/nbt.3122  
847 (2015).
- 848 69 Song, L., Sabunciyan, S. & Florea, L. CLASS2: accurate and efficient splice  
849 variant annotation from RNA-seq reads. *Nucleic Acids Res* **44**, e98,  
850 doi:10.1093/nar/gkw158 (2016).
- 851 70 Wu, T. D. & Watanabe, C. K. GMAP: a genomic mapping and alignment  
852 program for mRNA and EST sequences. *Bioinformatics* **21**, 1859–1875,  
853 doi:10.1093/bioinformatics/bti310 (2005).
- 854 71 Stanke, M., Tzvetkova, A. & Morgenstern, B. AUGUSTUS at EGASP: using  
855 EST, protein and genomic alignments for improved gene prediction in the  
856 human genome. *Genome Biol* **7 Suppl 1**, S11.11–18,  
857 doi:10.1186/gb-2006-7-s1-s11 (2006).
- 858 72 Korf, I. Gene finding in novel genomes. *BMC Bioinformatics* **5**, 59,  
859 doi:10.1186/1471-2105-5-59 (2004).
- 860 73 Hoff, K. J., Lange, S., Lomsadze, A., Borodovsky, M. & Stanke, M.  
861 BRAKER1: unsupervised RNA-Seq-Based genome annotation with  
862 GeneMark-ET and AUGUSTUS. *Bioinformatics* **32**, 767–769,  
863 doi:10.1093/bioinformatics/btv661 (2016).
- 864 74 Conesa, A. *et al.* Blast2GO: a universal tool for annotation, visualization and  
865 analysis in functional genomics research. *Bioinformatics* **21**, 3674–3676,

866 doi:10.1093/bioinformatics/bti610 (2005).

867 75 Wu, C. C., Ho, C. K. & Chang, S. H. The complete chloroplast genome of  
868 *Cinnamomum kanehirae* Hayata (Lauraceae). *Mitochondr DNA* **27**, 2681–  
869 2682, doi:10.3109/19401736.2015.1043541 (2016).

870 76 Smith, D. R., Crosby, K. & Lee, R. W. Correlation between nuclear plastid  
871 DNA abundance and plastid number supports the limited transfer window  
872 hypothesis. *Genome Biol Evol* **3**, 365–371, doi:10.1093/gbe/evr001 (2011).

873 77 Li, H. & Durbin, R. Fast and accurate short read alignment with  
874 Burrows-Wheeler transform. *Bioinformatics* **25**, 1754–1760,  
875 doi:10.1093/bioinformatics/btp324 (2009).

876 78 Li, H. *et al.* The Sequence Alignment/Map format and SAMtools.  
877 *Bioinformatics (Oxford, England)* **25**, 2078–2079,  
878 doi:10.1093/bioinformatics/btp352 (2009).

879 79 Danecek, P. *et al.* The variant call format and VCFtools. *Bioinformatics* **27**,  
880 2156–2158, doi:10.1093/bioinformatics/btr330 (2011).

881 80 Buschiazzo, E., Ritland, C., Bohlmann, J. & Ritland, K. Slow but not low:  
882 genomic comparisons reveal slower evolutionary rate and higher dN/dS in  
883 conifers compared to angiosperms. *BMC Evol Biol* **12**, 8,  
884 doi:10.1186/1471-2148-12-8 (2012).

885 81 Cao, Y. N. *et al.* Inferring spatial patterns and drivers of population divergence  
886 of *Neolitsea sericea* (Lauraceae), based on molecular phylogeography and  
887 landscape genomics. *Mol Phylogenet Evol* **126**, 162–172,  
888 doi:10.1016/j.ympev.2018.04.010 (2018).

889 82 Smit, A. & Hubley, R. *RepeatModeler Open-1.0*, <http://www.repeatmasker.org>  
890 (2008–2015).

891 83 Smit, A., Hubley, R. & Green, P. *RepeatMasker Open-4.0*,  
892 <http://www.repeatmasker.org> (2013–2015).

893 84 Abrusan, G., Grundmann, N., DeMester, L. & Makalowski, W. TEclass--a tool  
894 for automated classification of unknown eukaryotic transposable elements.  
895 *Bioinformatics* **25**, 1329–1330, doi:10.1093/bioinformatics/btp084 (2009).

896 85 Guan, R. *et al.* Draft genome of the living fossil *Ginkgo biloba*. *Gigascience* **5**,  
897 49, doi:10.1186/s13742-016-0154-1 (2016).

898 86 Katoh, K. & Standley, D. M. MAFFT multiple sequence alignment software  
899 version 7: improvements in performance and usability. *Mol Biol Evol* **30**, 772–  
900 780, doi:10.1093/molbev/mst010 (2013).

901 87 Price, M. N., Dehal, P. S. & Arkin, A. P. FastTree 2--approximately  
902 maximum-likelihood trees for large alignments. *PLoS One* **5**, e9490,  
903 doi:10.1371/journal.pone.0009490 (2010).



904 88 Paradis, E., Claude, J. & Strimmer, K. APE: Analyses of phylogenetics and  
905 evolution in R language. *Bioinformatics* **20**, 289–290 (2004).

906 89 Sundell, D. *et al.* The plant genome integrative explorer resource:  
907 PlantGenIE.org. *New Phytol* **208**, 1149–1156, doi:10.1111/nph.13557 (2015).

908 90 Sneddon, T. P., Li, P. & Edmunds, S. C. GigaDB: announcing the GigaScience  
909 database. *Gigascience* **1**, 11, doi:10.1186/2047-217X-1-11 (2012).

910 91 Bolser, D., Staines, D. M., Pritchard, E. & Kersey, P. Ensembl Plants:  
911 integrating tools for visualizing, mining, and analyzing plant genomics data.  
912 *Methods Mol Biol* **1374**, 115–140, doi:10.1007/978-1-4939-3167-5\_6 (2016).

913 92 Kumar, S., Stecher, G., Suleski, M. & Hedges, S. B. TimeTree: a resource for  
914 timelines, timetrees, and divergence times. *Mol Biol Evol* **34**, 1812–1819,  
915 doi:10.1093/molbev/msx116 (2017).

916 93 Pryer, K. M. *et al.* Horsetails and ferns are a monophyletic group and the  
917 closest living relatives to seed plants. *Nature* **409**, 618–622,  
918 doi:10.1038/35054555 (2001).

919 94 Lyons, E. *et al.* Finding and comparing syntenic regions among *Arabidopsis*  
920 and the outgroups papaya, poplar, and grape: CoGe with rosids. *Plant Physiol*  
921 **148**, 1772–1781, doi:10.1104/pp.108.124867 (2008).

922 95 Haas, B. J., Delcher, A. L., Wortman, J. R. & Salzberg, S. L. DAGchainer: a  
923 tool for mining segmental genome duplications and synteny. *Bioinformatics*  
924 (*Oxford, England*) **20**, 3643–3646, doi:10.1093/bioinformatics/bth397 (2004).

925 96 Wright, E. Using DECIPHER v2.0 to analyze big biological sequence data in  
926 R. *The R Journal* **8**, 352–359 (2016).

927 97 Quinlan, A. R. & Hall, I. M. BEDTools: a flexible suite of utilities for  
928 comparing genomic features. *Bioinformatics (Oxford, England)* **26**, 841–842,  
929 doi:10.1093/bioinformatics/btq033 (2010).

930 98 Ming, R. *et al.* The pineapple genome and the evolution of CAM  
931 photosynthesis. *Nat Genet* **47**, 1435–1442, doi:10.1038/ng.3435 (2015).

932 99 Lozano, R., Hamblin, M. T., Prochnik, S. & Jannink, J. L. Identification and  
933 distribution of the NBS-LRR gene family in the Cassava genome. *BMC*  
934 *Genomics* **16**, 360, doi:10.1186/s12864-015-1554-9 (2015).

935 100 Eddy, S. R. Accelerated profile HMM searches. *PLoS Comput Biol* **7**,  
936 e1002195, doi:10.1371/journal.pcbi.1002195 (2011).

937 101 Finn, R. D. *et al.* InterPro in 2017-beyond protein family and domain  
938 annotations. *Nucleic Acids Res* **45**, D190–D199, doi:10.1093/nar/gkw1107  
939 (2017).

940 102 He, Z. *et al.* Evolvview v2: an online visualization and management tool for  
941 customized and annotated phylogenetic trees. *Nucleic Acids Res* **44**, W236–

- 942 241, doi:10.1093/nar/gkw370 (2016).
- 943 103 Matasci, N. *et al.* Data access for the 1,000 Plants (1KP) project. *Gigascience*  
944 **3**, 17, doi:10.1186/2047-217X-3-17 (2014).
- 945 104 Aubourg, S., Lecharny, A. & Bohlmann, J. Genomic analysis of the terpenoid  
946 synthase (*AtTPS*) gene family of *Arabidopsis thaliana*. *Mol Genet Genomics*  
947 **267**, 730–745, doi:10.1007/s00438-002-0709-y (2002).
- 948 105 Irmisch, S., Jiang, Y., Chen, F., Gershenzon, J. & Köllner, T. G. Terpene  
949 synthases and their contribution to herbivore-induced volatile emission in  
950 western balsam poplar (*Populus trichocarpa*). *BMC Plant Biol* **14**, 270,  
951 doi:10.1186/s12870-014-0270-y (2014).
- 952 106 Martin, D. M. *et al.* Functional annotation, genome organization and  
953 phylogeny of the grapevine (*Vitis vinifera*) terpene synthase gene family based  
954 on genome assembly, FLcDNA cloning, and enzyme assays. *BMC Plant Biol*  
955 **10**, 226, doi:10.1186/1471-2229-10-226 (2010).
- 956 107 Wheeler, T. J. & Eddy, S. R. nhmmer: DNA homology search with profile  
957 HMMs. *Bioinformatics* **29**, 2487–2489, doi:10.1093/bioinformatics/btt403  
958 (2013).
- 959 108 Kumar, S., Stecher, G. & Tamura, K. MEGA7: Molecular evolutionary  
960 genetics analysis version 7.0 for bigger datasets. *Mol Biol Evol* **33**, 1870–1874,  
961 doi:10.1093/molbev/msw054 (2016).
- 962 109 Price, M. N., Dehal, P. S. & Arkin, A. P. FastTree: computing large minimum  
963 evolution trees with profiles instead of a distance matrix. *Mol Biol Evol* **26**,  
964 1641–1650, doi:10.1093/molbev/msp077 (2009).
- 965
- 966
- 967

**a**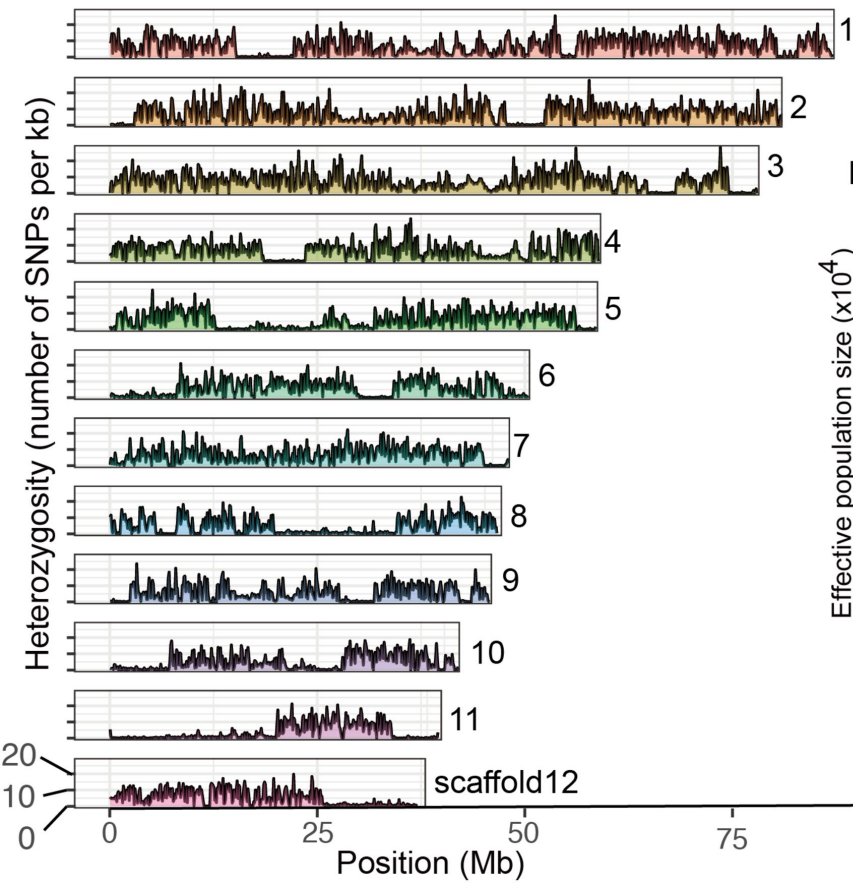**b**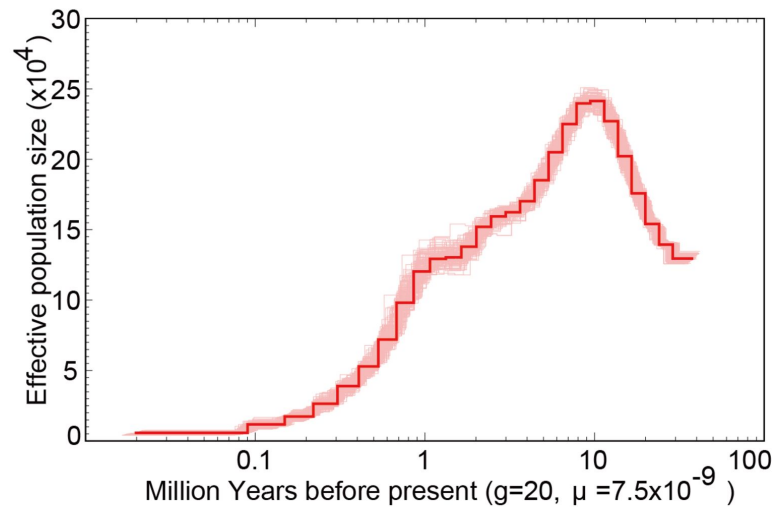

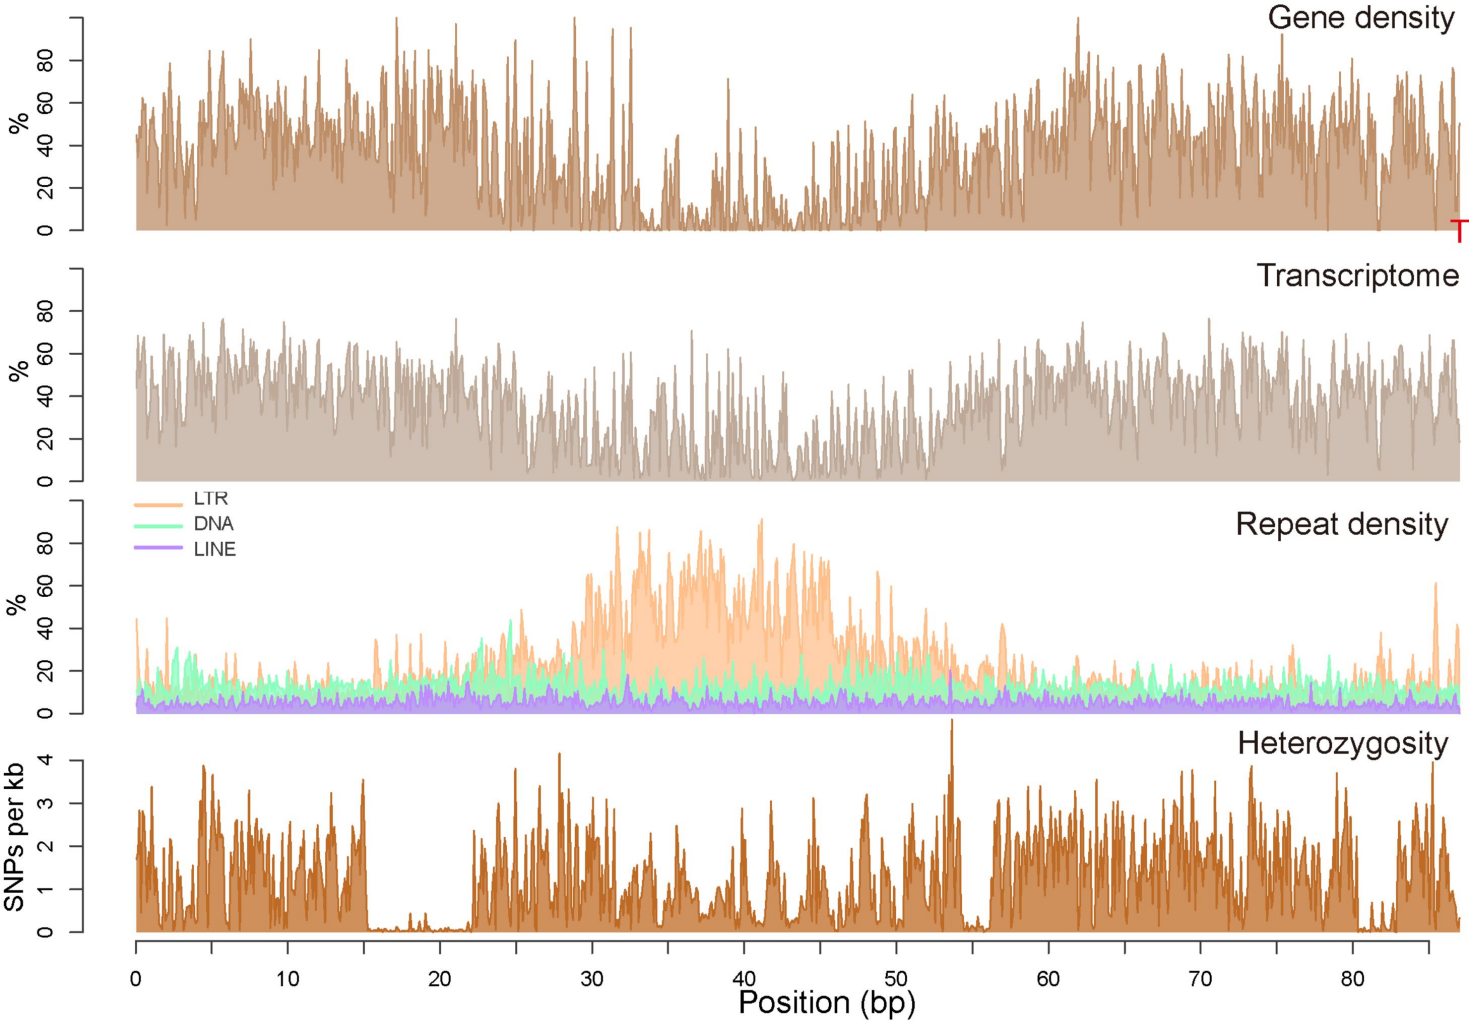

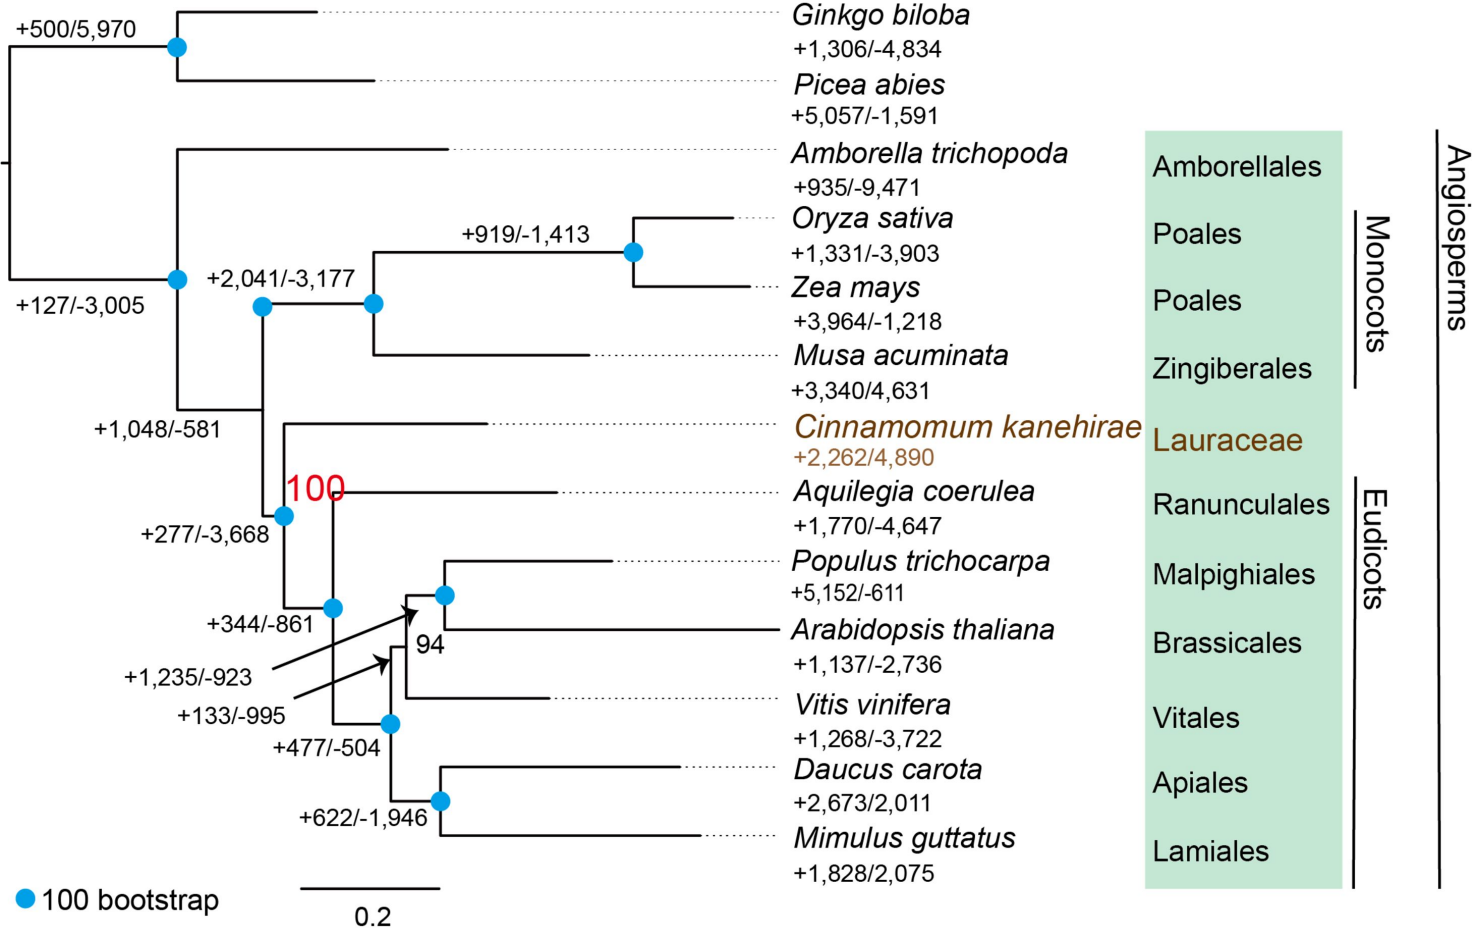

**a**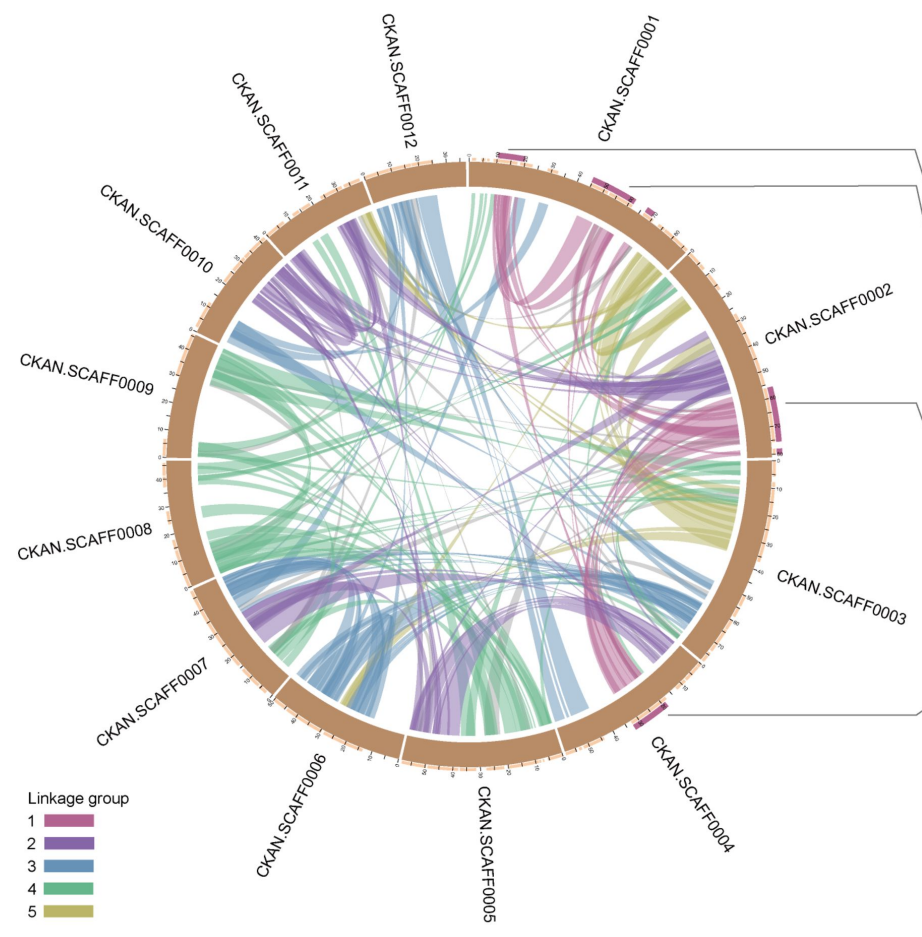**b**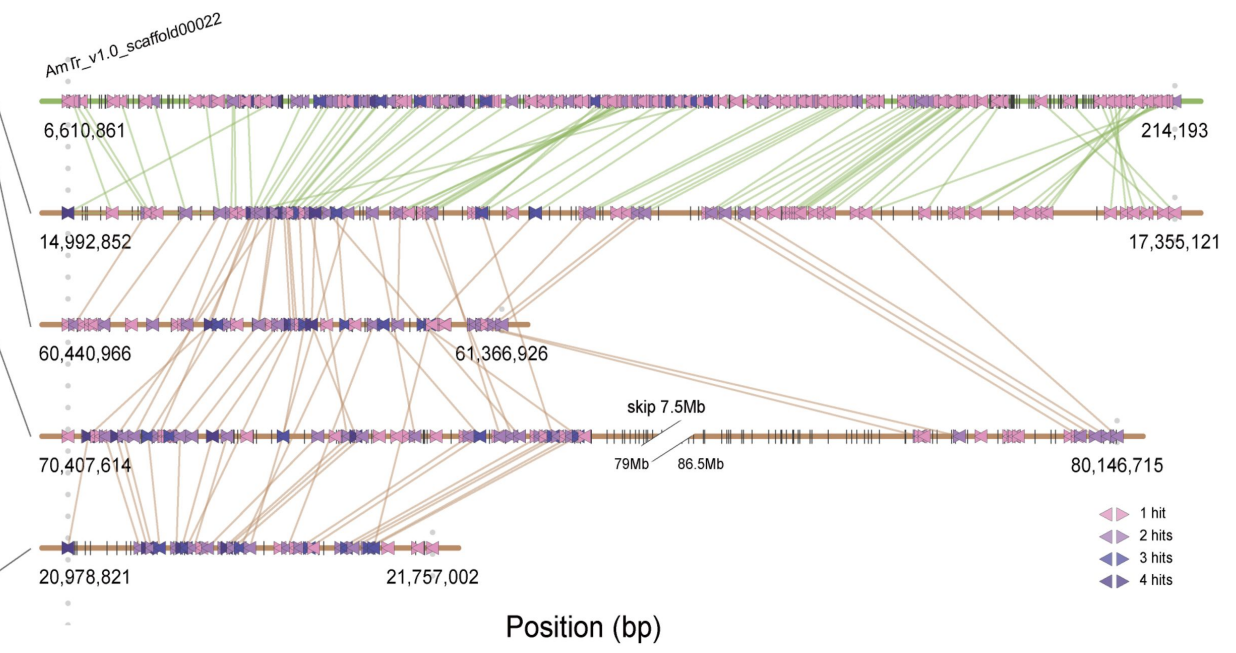

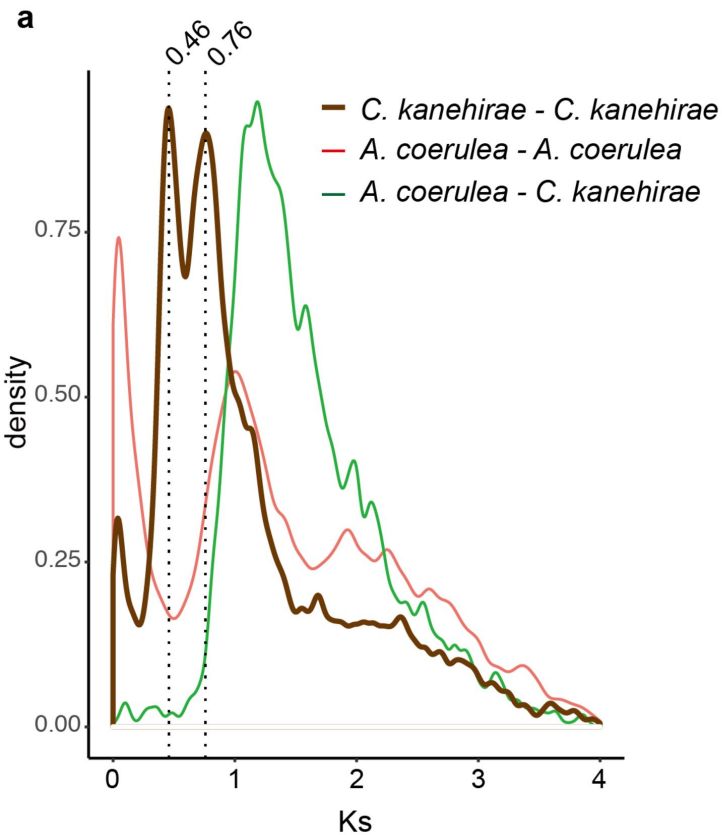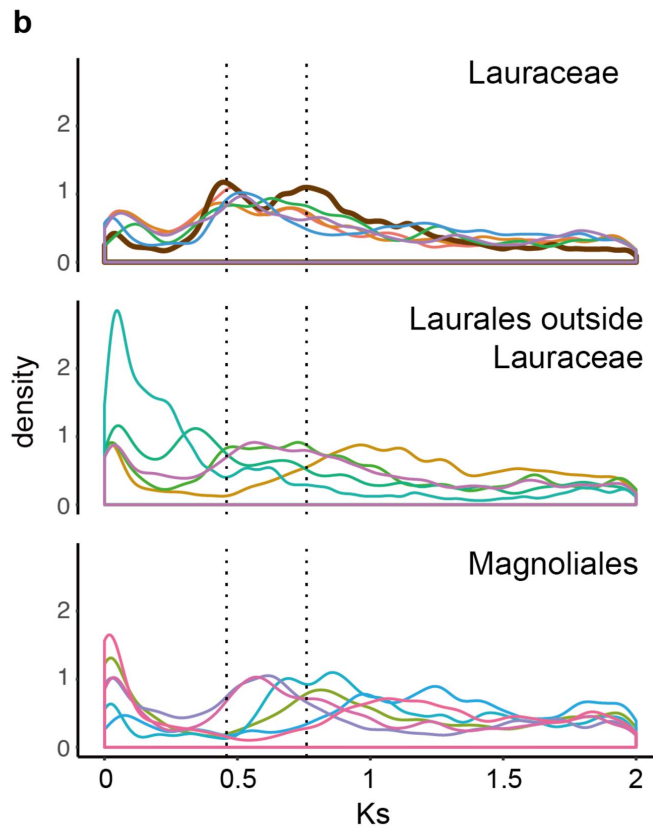

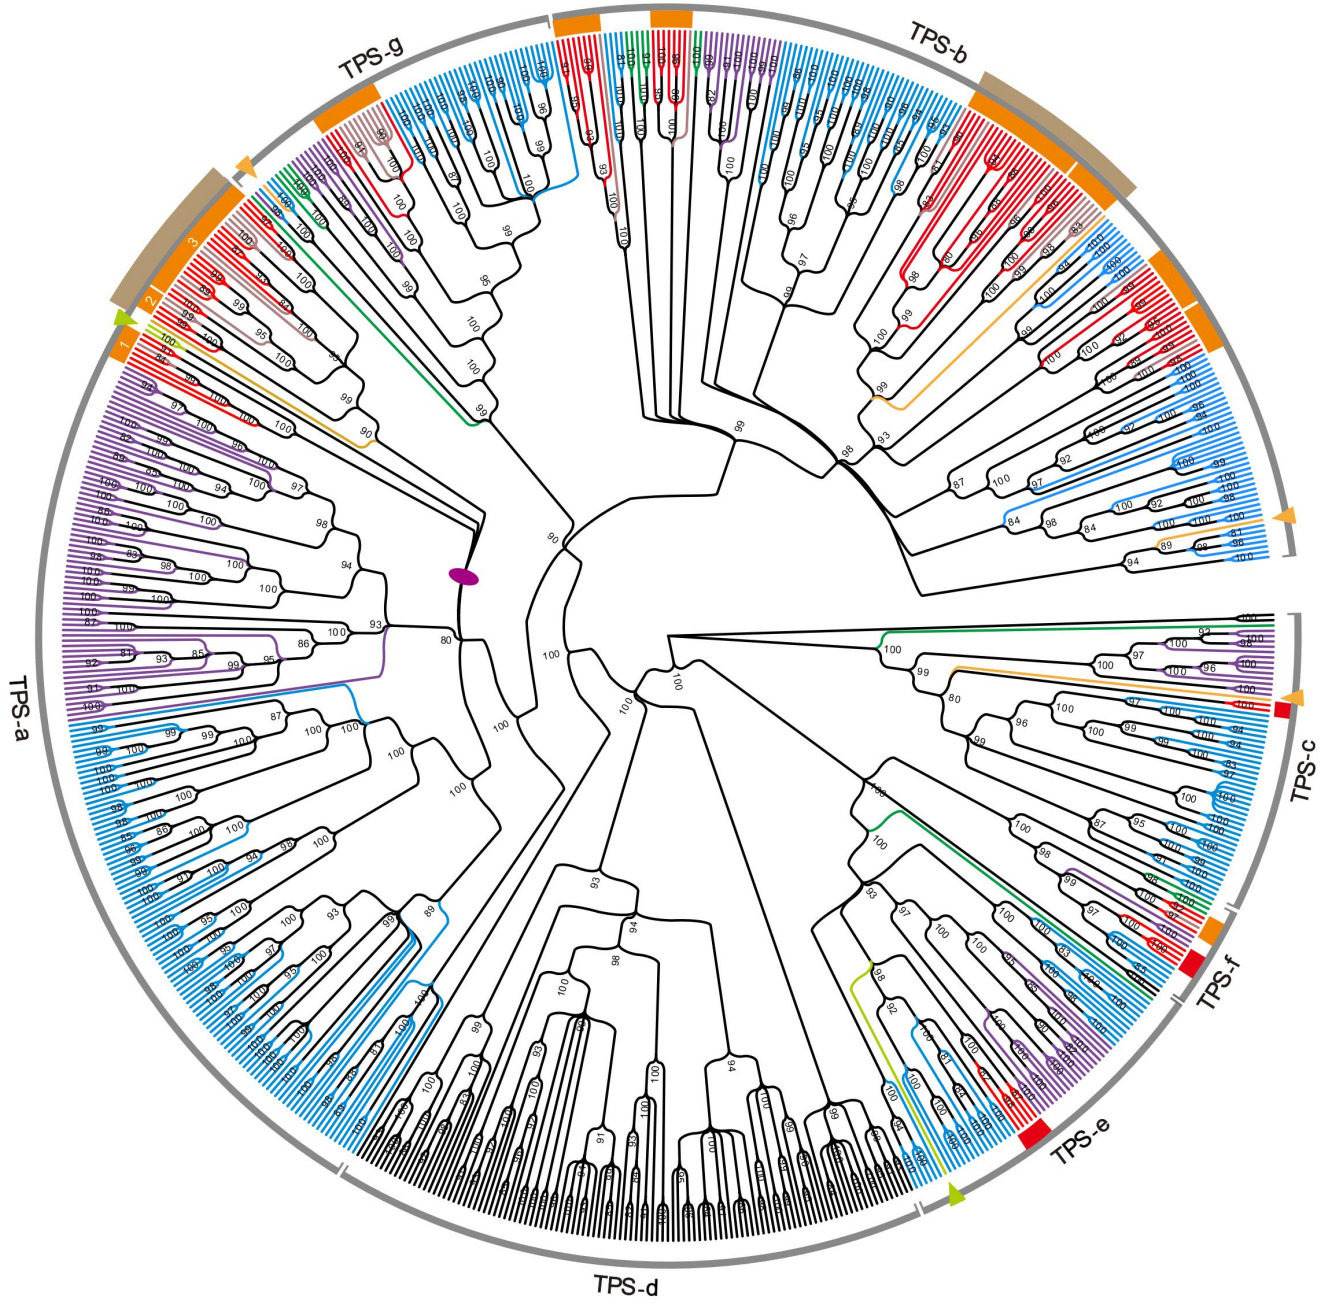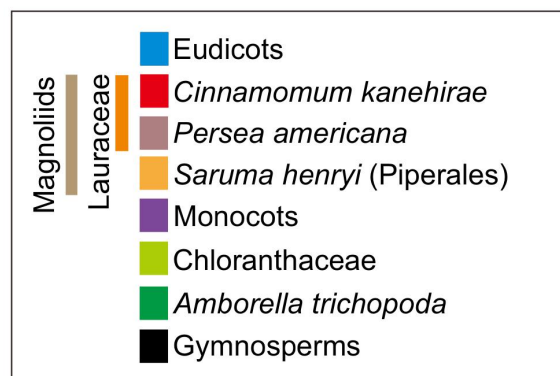



|                                    | <b>Illumina (v1)</b> | <b>Pacbio (v2)</b> | <b>Pacbio + HiC (v3)</b> |
|------------------------------------|----------------------|--------------------|--------------------------|
| <b>Assembly feature</b>            |                      |                    |                          |
| Size (Mb)                          | 714.7                | 728.3              | 730.7                    |
| Num. scaffolds                     | 48,650               | 5,210              | 2,153                    |
| Average (Kb)                       | 15                   | 140                | 339                      |
| Largest scaffold (Mb)              | 6.2                  | 12.8               | 87.0                     |
| N50 (Mb)                           | 0.6                  | 0.9                | 50.4                     |
| L50 (n)                            | 254                  | 185                | 6                        |
| N90 (Mb)                           | 0.003                | 0.058              | 37.1                     |
| L90 (n)                            | 6,123                | 1,709              | 12                       |
| <b>Genome annotation</b>           |                      |                    |                          |
| Num. genes (n)                     |                      |                    | 27,899                   |
| Gene model (Mb)                    |                      |                    | 235.6                    |
| Exons (Mb)                         |                      |                    | 36.4                     |
| Intron length (Mb)                 |                      |                    | 199.2                    |
| Num. genes in 12 largest scaffolds |                      |                    | 26,692                   |
| BUSCO completeness (%)             |                      |                    | 88.5                     |

**Table 1.** Statistics of the stout camphor tree genome assemblies using different sequencing technologies and final gene predictions.

**Table 2. Numbers of TPS subfamilies in the 14 genomes and three transcriptomes of major seed plant lineages.**

| TPS subfamilies                      | Genome size (Mb) | Primary Metabolism    |         | Secondary Metabolism |           |                |     |     | Total no. |
|--------------------------------------|------------------|-----------------------|---------|----------------------|-----------|----------------|-----|-----|-----------|
|                                      |                  | c                     | e       | a                    | b         | d <sup>2</sup> | f   | g   |           |
| Function                             |                  | CPS, C20 <sup>1</sup> | KS, C20 | C15                  | IspS, C10 | C10,15,20      | C20 | C10 |           |
| Species                              |                  |                       |         |                      |           |                |     |     |           |
| <b>Gymnosperms</b>                   |                  |                       |         |                      |           |                |     |     |           |
| <i>Ginkgo biloba</i>                 | 10,609           | 1                     | 1       | -                    | -         | 49             | -   | -   | 51        |
| <i>Picea abies</i>                   | 12,301           | 2                     | 1       | -                    | -         | 59             | -   | -   | 62        |
| <b>Angiosperms</b>                   |                  |                       |         |                      |           |                |     |     |           |
| <i>Amborella trichopoda</i>          | 706              | 1                     | 1       | -                    | 7         | -              | 3   | 5   | 17        |
| <b>Chloranthaceae</b>                |                  |                       |         |                      |           |                |     |     |           |
| <i>Sarcandra glabra</i> <sup>3</sup> | -                | -                     | 1       | 2                    | -         | -              | -   | -   | 3         |
| <b>Magnoliids</b>                    |                  |                       |         |                      |           |                |     |     |           |
| <b>Lauraceae</b>                     |                  |                       |         |                      |           |                |     |     |           |
| <i>Cinnamomum kanehirae</i>          | 731              | 2                     | 5       | 25                   | 58        | -              | 7   | 4   | 101       |
| <i>Persea americana</i> <sup>3</sup> | -                | -                     | -       | 11                   | 12        | -              | 1   | 9   | 33        |
| <b>Piperales</b>                     |                  |                       |         |                      |           |                |     |     |           |
| <i>Saruma henryi</i> <sup>3</sup>    | -                | 1                     | -       | 1                    | 2         | -              | -   | 1   | 5         |
| <b>Monocots</b>                      |                  |                       |         |                      |           |                |     |     |           |
| <i>Musa acuminata</i>                | 473              | 2                     | 2       | 21                   | 13        | -              | 3   | 3   | 44        |
| <i>Oryza sativa</i>                  | 375              | 3                     | 10      | 19                   | -         | -              | -   | 1   | 33        |
| <i>Zea mays</i>                      | 2,068            | 8                     | 6       | 30                   | 2         | -              | -   | 5   | 51        |
| <b>Eudicots</b>                      |                  |                       |         |                      |           |                |     |     |           |
| <i>Aquilegia coerulea</i>            | 307              | 15                    | 13      | 12                   | 34        | -              | -   | 8   | 82        |
| <b>Rosids</b>                        |                  |                       |         |                      |           |                |     |     |           |
| <i>Arabidopsis thaliana</i>          | 120              | 1                     | 1       | 23                   | 5         | -              | 1   | 1   | 32        |

|                                    |     |    |    |    |    |   |   |    |                 |
|------------------------------------|-----|----|----|----|----|---|---|----|-----------------|
| <i>Populus trichocarpa</i>         | 473 | 2  | 2  | 16 | 14 | - | 1 | 3  | 38              |
| <i>Vitis vinifera</i> <sup>4</sup> | 434 | 2  | 1  | 29 | 10 | - | 2 | 14 | 58 <sup>4</sup> |
| <b>Asterids</b>                    |     |    |    |    |    |   |   |    |                 |
| <i>Daucus carota</i>               | 422 | 3  | 2  | 1  | 15 | - | 1 | 7  | 29              |
| <i>Mimulus guttatus</i>            | 313 | 13 | 13 | 19 | 17 | - | - | 1  | 63              |

<sup>1</sup> The “C” and “Arabic number” within the parenthesis designate C10: monoterpene; C15: sesquiterpenes; C20: dipterids.

CPS: copalyl diphosphate synthase; KS: kaurene synthase; IspS: isoprene synthase.

<sup>2</sup> TPS-d subfamily is gymnosperm-specific.

<sup>3</sup> Transcriptome data of these three taxa were highly likely incomplete for covering all TPS transcripts, so that their total numbers of TPS were not reliable but for reference only.

<sup>4</sup> These two TPS-f were previously characterized from grape floral cDNA without identical genomic *VvTPS* genes (Martin et al., 2010); *VvTPS* sequences that labeled as unknown (Martin et al., 2010) in the TPS gene tree were not counted.
